# Supplementary material for: Trade-off between benefits, harms and economic efficiency of low-dose CT lung cancer screening: a microsimulation analysis of nodule management strategies in a population-based setting
Source: PubMed Central journal article supplement (PMC5571665; doi:10.1186/s12916-017-0924-3), 2017-08-25
Supplement: 12916_2017_924_MOESM1_ESM.pdf [file 12916_2017_924_MOESM1_ESM.pdf]

## Additional file 1

The first section of the current document contains a detailed description of the developed microsimulation model. The second part gives main results of model calibration and simulation.

### *Content*

|                                                                                                |                                           |
|------------------------------------------------------------------------------------------------|-------------------------------------------|
| Tables .....                                                                                   | 2                                         |
| Figures .....                                                                                  | 2                                         |
| 1. Methods.....                                                                                | 3                                         |
| 1.1. Modules of the microsimulation model .....                                                | 3                                         |
| 1.1.1. Population module .....                                                                 | 3                                         |
| 1.1.1.1. Other-cause mortality .....                                                           | 3                                         |
| 1.1.2. Natural History module .....                                                            | 3                                         |
| 1.1.3. Clinical detection and Survival module .....                                            | 4                                         |
| 1.1.4. Modelling details of the Natural History, Clinical detection and Survival modules ..... | 4                                         |
| 1.1.4.1. Onset of the first malignant cell: .....                                              | 4                                         |
| 1.1.4.2. Tumour growth .....                                                                   | 7                                         |
| 1.1.4.3. Modelling regional and distant stages of the disease progression.....                 | 8                                         |
| 1.1.5. Screening module .....                                                                  | 9                                         |
| 1.1.5.1. Eligibility assessment .....                                                          | 9                                         |
| 1.1.5.2. Screen-detection .....                                                                | 9                                         |
| 1.1.5.3. Nodule management algorithms .....                                                    | 9                                         |
| 1.1.5.4. Diagnostic work-up.....                                                               | 10                                        |
| 1.1.5.5. Lung cancer survival .....                                                            | 10                                        |
| 1.1.6. Life history module .....                                                               | 11                                        |
| 1.1.6.1. False-positive findings .....                                                         | 11                                        |
| 1.1.1.1. Overdiagnosed cases.....                                                              | 11                                        |
| 1.1.1.2. Interval lung cancer .....                                                            | 11                                        |
| 1.1.1.3. Radiation-induced cancer .....                                                        | 11                                        |
| 1.1.7. Screening scenarios.....                                                                | 11                                        |
| 1.1.8. Screening module: Parameters overview .....                                             | 12                                        |
| 1.2. Model calibration .....                                                                   | 12                                        |
| 1.3. Health economics .....                                                                    | 13                                        |
| 1.4. Sensitivity analysis .....                                                                | 14                                        |
| 2. Results.....                                                                                | 15                                        |
| 2.1. Calibration.....                                                                          | 15                                        |
| 2.2. Benefits and harms of lung cancer screening for the baseline scenarios .....              | 18                                        |
| 2.3. Main outcomes and Cost-effectiveness of the 76 baseline screening scenarios .....         | 21                                        |
| 2.4. Cost-effectiveness of the efficient screening scenarios in the sensitivity analyses ..... | 23                                        |
| References.....                                                                                | <b>Fehler! Textmarke nicht definiert.</b> |

## Tables

|                                                                                                                                                                                                                                                  |    |
|--------------------------------------------------------------------------------------------------------------------------------------------------------------------------------------------------------------------------------------------------|----|
| Table S1: Parameters for the long-term survival probability and the Weibull distributions for time period from clinical diagnosis to lung cancer death by cell type and stage at diagnosis <sup>7</sup> .....                                    | 4  |
| Table S2: Parameters for the cumulative hazard functions .....                                                                                                                                                                                   | 5  |
| Table S3: Age boundaries ("a and b") for parametrization of age-dependent risk of the onset of the first malignant given in years by gender and histological class. ....                                                                         | 6  |
| Table S4: Parameters for malignant conversion rate of initiated cells ( $\mu$ )* by gender, period and cell type. ....                                                                                                                           | 6  |
| Table S5: Distribution of alpha parameters, $\alpha$ , for the growth rate applied in the Gompertz tumour growth function <sup>5</sup> .....                                                                                                     | 8  |
| Table S6: Threshold values for volumes in mm <sup>3</sup> used to construct the log-Normal distributions in modelling of the disease progression. The parameters were fitted using data on lung cancer stages by Eberle 2015 <sup>11</sup> ..... | 9  |
| Table S7: Parameters of the screening component .....                                                                                                                                                                                            | 12 |
| Table S8: Cost per unit: screening and no screening.....                                                                                                                                                                                         | 13 |
| Table S9: Lifetime treatment costs for patients diagnosed with lung cancer by cancer stages calculated for 50-75-15-9-NELSON-VDT400-V500. ....                                                                                                   | 14 |
| Table S10: Benefits and harms of lung cancer screening for the baseline scenarios .....                                                                                                                                                          | 18 |
| Table S11: Benefits and harms of lung cancer screening for the baseline scenarios (continued).....                                                                                                                                               | 19 |
| Table S12: Main outcomes and Cost-effectiveness of the 76 baseline screening scenarios.....                                                                                                                                                      | 21 |
| Table S13: Cost-effectiveness of the efficient screening scenarios in the sensitivity analyses.....                                                                                                                                              | 23 |
| Table S14: Comparison of the microsimulation model outcomes with the data from the NLST trial .....                                                                                                                                              | 24 |

## Figures

|                                                                                                                  |    |
|------------------------------------------------------------------------------------------------------------------|----|
| Figure S1: Diagnosed lung cancer cases, Men, 2010. ....                                                          | 15 |
| Figure S2: Diagnosed lung cancer cases, Men, 2011. ....                                                          | 15 |
| Figure S3: Diagnosed lung cancer cases, Men, 2012. ....                                                          | 16 |
| Figure S4: Diagnosed lung cancer cases, Women, 2010. ....                                                        | 16 |
| Figure S5: Diagnosed lung cancer cases, Women, 2011. ....                                                        | 17 |
| Figure S6: Diagnosed lung cancer cases, Women, 2012. ....                                                        | 17 |
| Figure S7: Accumulated lung cancer death cases 50-75-15-9-NELSON-VDT400-V500 vs. 50-75-15-9-NLST-GR10-D10.....   | 20 |
| Figure S8: Accumulated lung cancer death cases 55-74-30-15-NELSON-VDT400-V500 vs. 55-74-30-15-NLST-GR10-D10..... | 20 |

# 1. Methods

## 1.1. Modules of the microsimulation model

The model is of modular design and comprises of the following structural modules: Population, Natural History, Clinical Detection and Survival, Screening and Life History.

### 1.1.1. Population module

Population module creates a screening population with the given demographic structure and smoking patterns. The individuals in the simulated population were characterized by gender, age at model entry point and then defined by the age at the point of initial smoking, age at smoking cessation and the average number of cigarettes consumed per day. Smoking history determines the exposure to cigarette smoke (first hand), which along with age and gender governs age of death from other causes.

Smoking behaviour data were obtained from two national health surveys conducted between 2008 and 2012: the German Health Interview and Examination Survey for Adults (DEGS) and the German Health Update (GEDA)<sup>1</sup>. Due to the data availability, the demographic structure was taken from the year of 2012<sup>2</sup>. Based on the smoking behaviour data and demographic structure, the population for the simulation was obtained via bootstrapping 10% of the German population. Smoking behaviours of current smokers were extrapolated over the course of a lifetime and during the modelled years the current smokers could quit smoking. The smoking cessation age was calculated by using the smoking cessation probabilities, which were assigned according to estimates obtained based on the data from the national health surveys.

#### 1.1.1.1. Other-cause mortality

In the Population module an individual age of death from other causes than lung cancer is simulated based on age at entry the model, gender and the smoking status: never-, current- or former smoker. Five-year survival probabilities across age, gender and the smoking status were constructed based on the estimates obtained by Woloshin et al<sup>3</sup> and extrapolated using the recent life tables for the German population<sup>2</sup>. Other-cause mortality was introduced into the model as a competing risk and computed by applying the probability estimates and two random numbers (for each individual) which defined a five-year age interval in which the person may die from other causes and then the exact age of death within this interval.

### 1.1.2. Natural History module

The Natural History module simulates the development of lung cancer during individual life course. The sequence of events starts with onset of the first malignant cell, evolves through the progressive stages of lung cancer and ends with the death from the cancer.

The onset of the first malignant cell is simulated by using the biological two-stage clonal expansion (TSCE) model described by Moolgavkar and Luebeck<sup>4</sup>, where age, gender and personal exposure to cigarette smoke are translated into the piecewise constant parameters of the hazard functions. Onset lung cancer is modelled as a competing risk between four histological types: small cell-, large cell-, squamous cell- and adenocarcinomas. For

each histological type, we drew an individual age at onset of carcinogenesis from a respective survival function. The histologic type that develops first is defined as the active cancer. We assume that 20% of adenocarcinomas are of type adenocarcinoma in situ<sup>5</sup>. Additionally, if the onset of cancer takes place, we assume a single malignant nodule per person.

The progression of the cancer is characterised by its growth, nodal involvement and occurrence of distant metastases. Threshold values of tumour volumes at the stages of nodal involvement and distant metastases depend on the histologic cancer type and are randomly drawn from log-Normal distributions. We applied a Gompertz function to model tumour growth over time<sup>5</sup>. This function determines the individual age at every stage of disease progression given the respective threshold volumes are reached (see section Modelling details of the Natural History, Clinical detection and Survival modules).

### 1.1.3. Clinical detection and Survival module

Clinical detection and Survival module simulates symptomatic detection of lung cancer, which includes age and tumour volume at the time of diagnosis, and age of death from lung cancer. The distribution of the tumour volumes at time of diagnosis is given by the log-Normal distribution; age at the time of diagnosis is analogously calculated by using the tumour growth function. Persons with clinical detection undergo diagnostic procedures which include PET CT, EBUS bronchoscopy and head MRI<sup>6</sup>. The diagnosis is assigned according to the TNM Classification of Malignant Tumours (TNM) by the Union for International Cancer Control (UICC). Treatment is not explicitly modelled, however, its effects are implicitly included in lung cancer survival function. The survival depends on the histological class and stage at the time of diagnosis and follows the Weibull distribution<sup>7</sup> (see Table 1). It is assumed that death from lung cancer occurs after the time of clinical diagnosis.

**Table S1: Parameters for the long-term survival probability and the Weibull distributions for time period from clinical diagnosis to lung cancer death by cell type and stage at diagnosis<sup>7</sup>.**

| Histological class               | Stage at Diagnosis | Long-term survival probability | Weibull distributions |       |
|----------------------------------|--------------------|--------------------------------|-----------------------|-------|
|                                  |                    |                                | Mean                  | Shape |
| Squamous cell- carcinoma         | I , II             | 0.180                          | 2.419                 | 0.573 |
| Squamous cell-carcinoma          | III , IV           | 0.060                          | 0.752                 | 0.641 |
| Adeno- and Large cell- carcinoma | I , II             | 0.290                          | 4.783                 | 0.676 |
| Adeno- and Large cell- carcinoma | III , IV           | 0.050                          | 0.674                 | 0.607 |
| Small cell-carcinoma             | I , II             | 0.080                          | 1.049                 | 0.727 |
| Small cell-carcinoma             | III , IV           | 0.010                          | 0.507                 | 0.738 |

### 1.1.4. Modelling details of the Natural History, Clinical detection and Survival modules

#### 1.1.4.1. Onset of the first malignant cell:

Onset of the first malignant cell of each histological class is expressed by the biological two-stage clonal expansion (TSCE) model. The hazard rates and the survival probabilities are given by the equations below which were adopted from an R package “Microsimulation Lung Cancer (MILC) model” by Chrysanthopoulou AS.<sup>8</sup>

Hazard function for the development of the first malignant cell is described by<sup>8</sup>:

$$h(t) = \frac{v\mu X (e^{(\gamma+2B)t} - 1)}{\gamma + B (e^{(\gamma+2B)t} + 1)}$$

where  $X$  is total number of normal cells,  $v$  is the normal cell initiation rate,  $\mu$  is the malignant transformation rate,  $\gamma$  and  $B$  are piecewise constant parameters which are determined by:

$$\gamma = \alpha - \beta - \mu \text{ and } B = \frac{1}{2} (-\gamma + \sqrt{\gamma^2 + 4\alpha\mu})$$

where  $\alpha$  the cell division rate and  $\beta$  is the rate of programmed cell death.

For the hazard function, a cumulative hazard function than is constructed and given by <sup>8</sup>:

$$H(t) = \frac{v\mu X}{\gamma + B} * \left( -t + \frac{1}{B} * \log(\gamma + B + B * e^{(\gamma+2B)t}) \right)$$

with

$$\alpha = \alpha_0 (1 + \alpha_1 q(t)^{\alpha_2}) \text{ and } \gamma = \gamma_0 (1 + \alpha_1 q(t)^{\alpha_2}),$$

where  $q(t)$  is the average number of cigarettes consumed per day at age  $t$  and  $\alpha_0$  and  $\gamma_0$  represent coefficients for never smokers. The parameters are given in Table 2.

**Table S2: Parameters for the cumulative hazard functions**

| Parameter                                                  | Males      | Females    | Reference                      |
|------------------------------------------------------------|------------|------------|--------------------------------|
| Total number of normal cells ( $X$ )                       | $10^7$     | $10^7$     | see Table 2 for CPS-II cohort. |
| Division rate of initiated cells non-smokers( $\alpha_0$ ) | 7.7        | 15.82      |                                |
| smokers: $\alpha_1$ ; $\alpha_2$                           | 0.6 ; 0.22 | 0.5 ; 0.32 |                                |
| Piecewise constant parameters non-smokers ( $\gamma_0$ )   | 0.09       | 0.071      |                                |
| The normal cell initiation rate non-smokers ( $v_0$ )      | = $\mu$    | = $\mu$    |                                |
| The normal cell initiation rate smokers ( $v_1$ )          | 0          | 0.02       |                                |

For each histological class, the cumulative hazard functions are transformed into the survival functions which describe the time of the onset of lung cancer and are given by <sup>8</sup>:

$$S(t) = \exp\{-H(t)\} = \exp\left\{-\int_0^t h(x) dx\right\}$$

For each individual with onset carcinogenesis, the ages of onset of the first malignant cell of each histological type are drawn from the respective survival functions. The type of the active cancer and age of onset of carcinogenesis are modelled through competing risks between the four histological types and are determined by the histological type of the earliest cancer.

The life course is segmented into periods which are defined by age, gender and smoking status. Table 3 describes the division. The periods are bounded by age given by  $a$  and  $b$ ,  $0 < a < b < t_d$ , where  $t_d$  depicts the age of death. Over these periods the survival functions are differently parameterized to express differences in the risk of onset of carcinogenesis. The parameters for the survival functions are given in Table 4 and are constant over the given period.

**Table S3: Age boundaries ("a and b") for parametrization of age-dependent risk of the onset of the first malignant given in years by gender and histological class.**

|               | Small cell-carcinoma | Large cell-carcinoma | Squamous cell-carcinoma | Adeno/AIS*-carcinoma |
|---------------|----------------------|----------------------|-------------------------|----------------------|
| <i>Male</i>   |                      |                      |                         |                      |
| Age1 (a)      | 50.88                | 50.31                | 49.75                   | 50.41                |
| Age2 (b)      | 64.54                | 66.09                | 62.62                   | 66.37                |
| <i>Female</i> |                      |                      |                         |                      |
| Age1 (a)      | 56.88                | 56.61                | 57.05                   | 56.07                |
| Age2 (b)      | 79.46                | 79.28                | 79.89                   | 79.19                |

\* adenocarcinoma *in situ*

**Table S4: Parameters for malignant conversion rate of initiated cells ( $\mu$ )\* by gender, period and cell type.**

|               | Small cell-carcinoma | Large cell-carcinoma | Squamous cell-carcinoma | Adeno/AIS-carcinoma |
|---------------|----------------------|----------------------|-------------------------|---------------------|
| <i>Male</i>   |                      |                      |                         |                     |
| 0 - a         | 2.13E-08             | 1.12E-08             | 2.70E-08                | 5.64E-08            |
| a - b         | 2.67E-08             | 1.05E-08             | 4.14E-08                | 8.58E-08            |
| b - 100       | 5.84E-08             | 2.07E-08             | 9.90E-08                | 1.26E-07            |
| <i>Female</i> |                      |                      |                         |                     |
| 0 - a         | 4.51E-08             | 2.00E-08             | 3.96E-08                | 1.27E-07            |
| a - b         | 7.37E-08             | 2.08E-08             | 7.46E-08                | 1.70E-07            |
| b - 100       | 5.26E-08             | 1.71E-08             | 5.91E-08                | 4.60E-08            |

\* The parameters were fitted using data on lung cancer incidence by Eberle 2015 and the German cancer registry<sup>10,11</sup>.

Depending on the smoking status an individual life course can be divided into periods as follows. The periods are denoted by  $T_1, T_2, T_3$  and  $T_4$ .

*Never smoker:*

For never smokers a life course is divided into three periods in which the survival function is parametrized with different malignant conversion rates (Table 4).

$$S(t) = \exp \left\{ - \int_0^{T_1} h(x) dx - \int_{T_1}^{T_2} h(x) dx - \int_{T_2}^{t_d} h(x) dx \right\},$$

with  $T_1 = a$  and  $T_1 = b$

*Current smoker:*

For current smokers a life course is divided into four periods which are defined by the age boundaries (as for never smokers) and age at start smoking. The age at smoking initiation can fall into any of the three periods and alter the parameterization for the hazard and survival functions over the periods following the time at smoking initiation as follows:

$$S(t) = \exp \left\{ - \int_0^{T_1} h(x) dx - \int_{T_1}^{T_2} h(x) dx - \int_{T_2}^{T_3} h(x) dx - \int_{T_3}^{t_d} h(x) dx \right\},$$

with  $T_{st}$  is age at start smoking,  $0 < a < b < t; 0 < T_{st} < t_d$ , and:

$$T_1 = \begin{cases} T_{st}, & T_{st} \leq a \\ a, & T_{st} > a \end{cases}$$

$$T_2 = \begin{cases} a, & T_{st} \leq a \\ T_{st}, & a < T_{st} < b \\ b, & T_{st} \geq b \end{cases}$$

$$T_3 = \begin{cases} T_{st}, & T_{st} \geq b \\ b, & T_{st} < b \end{cases}$$

*Former smoker:*

For former smokers a life course is divided into five periods given by the age boundaries (as for non-smokers), age at smoking initiation and age at smoking cessation. The hazard and survival functions are respectively parameterized over the pre-smoking, smoking and post-smoking periods.

The survival functions for former smokers are described as follows:

$$S(t) = \exp \left\{ - \int_0^{T_1} h(x) dx - \int_{T_1}^{T_2} h(x) dx - \int_{T_2}^{T_3} h(x) dx - \int_{T_3}^{T_4} h(x) dx - \int_{T_4}^{t_d} h(x) dx \right\},$$

with  $T_{st}$  age at initial cigarette smoking and  $T_q$  age of cessation,  $0 < a < b < t_d$ ;  $0 < T_{st} < T_q < t_d$ ,

and:

$$T_1 = \begin{cases} T_{st}, & T_{st} \leq a \\ a, & T_{st} > a \end{cases}$$

$$T_2 = \begin{cases} T_q, & T_q < a \\ a, & T_{st} < a \text{ and } T_q \geq a \\ T_{st}, & a < T_{st} < b \end{cases}$$

$$T_3 = \begin{cases} a, & T_q \geq a \\ b, & T_{st} < b \text{ and } T_q \geq b \\ T_q, & T_{st} < b \text{ and } T_q < b \\ T_{st}, & T_{st} \geq b \end{cases}$$

$$T_4 = \begin{cases} b, & T_q < a \\ T_q, & T_{st} \geq b \end{cases}$$

#### 1.1.4.2. Tumour growth

The following Gompertz function for tumour growth is applied:

$$V(t) = V_0 \cdot e^{\frac{\beta}{\alpha}(1-e^{-\alpha t})}$$

Where  $V_0$  and  $V(t)$  represent initial tumour volume and  $V(t)$  tumour volume at time  $t$ ,  $\alpha$  and  $\beta$  are the location and scale parameters of the Gompertz distribution.

Maximum tumour volume  $V_{max}$  in the Gompertz function is given by:

$$V_{max} = V_0 \cdot e^{\frac{\beta}{\alpha}}$$

With a given  $V_{max}$ , the volume of the tumour developed over time  $t$  is expressed by:

$$V(t) = V_{max} \cdot \left( \frac{V_0}{V_{max}} \right)^{e^{(-\alpha t)}}$$

and time needed to reach volume  $V(t)$  can be computed as:

$$t = \frac{\ln\left(\log \frac{V_0 \frac{V(t)}{V_{max}}}{V_{max}}\right)}{-\alpha},$$

where  $\alpha$  is the growth rate which is drawn from lognormal distributions parameterized according to the histological class (see Table 5) <sup>5</sup>.

Relationship between  $V_{max}$  and a set diameter is described by:

$$V_{max} = \frac{\pi}{6} (D)^3$$

where D is a given diameter.

Limits of diameters for  $V_{max}$  are fixed to 277 mm for all histological types except adenocarcinoma *in situ* for which the limit of diameter for  $V_{max}$  is set to 30 mm.

**Table S 5: Distribution of alpha parameters,  $\alpha$ , for the growth rate applied in the Gompertz tumour growth function <sup>5</sup>.**

| Histological class      | Distribution of alpha parameter | Mean Diameter (SD) at 0.5cm | Mean Diameter (SD) at 1.0cm | Mean Diameter (SD) at 1.5cm |
|-------------------------|---------------------------------|-----------------------------|-----------------------------|-----------------------------|
| Adeno/AIS-carcinoma     | logN(-7.765, 0.5504)            | 187(160)                    | 227(194)                    | 260(222)                    |
| Large cell-carcinoma    | logN(-6.59942, 0.68862)         | 61(61)                      | 74(74)                      | 85(85)                      |
| Small cell-carcinoma    | logN(-5.44357, 0.611485)        | 19(16)                      | 23(20)                      | 26(23)                      |
| Squamous cell-carcinoma | logN(-6.6111, 0.7935)           | 65(72)                      | 79(87)                      | 90(100)                     |

#### 1.1.4.3. Modelling regional and distant stages of the disease progression

The disease progression is featured via tumour growth, nodal involvement (regional stage) and metastases (distant stage). It has been previously shown that with a Gompertzian tumour growth function, the disease progression through advanced stages over time are characterized by specific tumour volumes, location and presence of metastases can be well described by applying log-Normal distributions <sup>8</sup>.

Threshold tumour volumes for regional and distant stages are drawn from log-Normal distributions constructed for each histological class  $i$  ( $i = 1,2,3,4$ ) and stage  $j$  ( $j$ =regional, distant, clinical diagnosis) as  $lognormal(\mu_{i,j}, \sigma_{i,j}^2)$ . If a person's threshold volume exceeds computed for her  $V_{max}$ , the corresponding cancer stage will not be reached during the lifetime of this person.

The threshold volumes across the histological classes and progression stages are given in the Table 6 below. The log-Normal distributions are constructed by transforming these volumes to mean and standard deviations of the  $lognormal(\mu_{i,j}, \sigma_{i,j}^2)$  distributions.



**Table S6: Threshold values for volumes in mm<sup>3</sup> used to construct the log-Normal distributions in modelling of the disease progression.** The parameters were fitted using data on lung cancer stages by Eberle 2015 <sup>11</sup>

| <b>Histological class</b> | <b>Regional stage<br/>Mean (SD)</b> | <b>Distant stage<br/>Mean (SD)</b> | <b>Diagnosis before<br/>the regional stage<br/>Mean (SD)</b> | <b>Diagnosis after<br/>the regional stage<br/>Mean (SD)</b> |
|---------------------------|-------------------------------------|------------------------------------|--------------------------------------------------------------|-------------------------------------------------------------|
| Small cell-carcinoma      | 610* (650)                          | 4,710* (4,140)                     | 4,787 (4,787)                                                | 9,031 (9,031)                                               |
| Large cell-carcinoma      | 2,299 (2,299)                       | 18,482 (18,482)                    | 8,262 (8,262)                                                | 25,144 (25,144)                                             |
| Squamous cell-carcinoma   | 8,466 (8,466)                       | 74,610 (74,610)                    | 24,458 (24,458)                                              | 56,418 (56,418)                                             |
| Adeno/AIS-carcinoma       | 3,038 (3,038)                       | 17,376 (17,376)                    | 9,899 (9,899)                                                | 27,304 (27,304)                                             |

\*adopted from McMahon et al 2012 <sup>5</sup>

### 1.1.5. Screening module

Screening module contains several structural components: eligibility assessment, screen-detection, nodule management (includes follow-up), diagnostic work-up and lung cancer survival.

#### 1.1.5.1. Eligibility assessment

The eligibility criteria include qualifying age range, accumulated pack-years and number of years since cigarette cessation. Once eligible an individual undergoes a screen chest exam with LDCT.

#### 1.1.5.2. Screen-detection

The probability of a screen-detection of a nodule depends on the presence of lung cancer and the sensitivity of the LDCT-test. The sensitivity of CT varies with nodule size and its location (Table 7). The location is considered of two types, central and peripheral, and varies with histological classes<sup>5</sup>. In the case of screen-detection of a nodule, the person proceeds through the nodule management algorithm. In the case of no detection, the person is scheduled for the next screening round.

#### 1.1.5.3. Nodule management algorithms

The nodule management includes the nodule size assessment, classification of the screening test results and follow-up scans. The output of the nodule management predetermines whether the person goes through the work-up component or is scheduled for the next screening round. During simulation only one of the NLST and NELSON nodule management is switched depending on the screening scenario under evaluation.

See Figures 2 and 3 in the main text.

In the NELSON-line nodule management protocol, based on the assessed volume ( $V$ ), the screening-detected nodule is classified as a negative ( $V < V_{fup}$ ), positive ( $V \geq V_{cut}$ ) or indeterminate result ( $V_{fup} \leq V < V_{cut}$ ). Individuals with the negative initial results continue with annual screening. Individuals with the positive initial results undergo immediate diagnostic work-up. Persons with the indeterminate results undergo a follow-up imaging exam at three months after the initial screening. Results of the follow-up exam are determined by the nodule volume and the growth rate. The growth rate is defined by assessment of volume change (%) and volume

doubling time (VDT) <sup>121</sup>. At the follow-up the initial results are reclassified as positive if the nodule volume reaches or exceeds the cut-off volume ( $V_{cut}$ ) and/or with VDT less than the threshold value ( $VDT_{cut}$ ) defined by the scenario. The person with these results undergoes the work-up diagnostic procedures. If VDT is more than the threshold value, the person proceeds with the annual periodicity follow-up till the requirements for the positive result are met. Volumes at the follow-ups are compared with the volume of the initial screen-finding.

The NLST-like nodule management algorithm includes diametric assessment of the nodule size and a sequence of follow-up procedures where tumour growth is estimated as a change (%) in the nodule diameter relative to the result at the initial screening. Based on the assessed diameter (D) the nodule is placed into one of the three categories: negative ( $D < D_{fup}$ ), positive intermediate ( $D_{fup} \leq D < D_{cut}$ ) and positive ( $D \geq D_{cut}$ )<sup>13</sup>. People with negative initial results proceed to the next screening round. People with the positive initial results undergo diagnostic evaluation. Individuals with the intermediate initial results undergo a course of follow-up chest imaging exams with LDCT. The follow-up can occur with the fixed periodicity: at three, six and twelve months after the initial screening. The number of follow-up scans is managed according to the diameter of the nodule and its growth during the time between the initial screening and the follow-up exam. The growth is defined as a percentage increase in diameter and determined in screening scenario ( $Growth_{cut}$ ). Measurement of growth is based on the comparison between the actual diameter and the diameter of the nodule found at the initial screen. In the follow-up course the diameter of 7 mm is the threshold diameter to undergo diagnostic evaluation. If at the first follow-up (at 3 months after the initial screening) no growth is detected, the person continues with an annual periodicity follow-up till the requirements for the positive result are met ( $D \geq 7$  mm)<sup>13</sup>. If the growth is present, the diameter is assessed. In case the diameter does not exceed the threshold, the person undergoes the next follow-up round within 6 month after the initial screening with assessment of the diameter. If the diameter of the nodule at the second follow-up (6 months) is over 7 mm, the person proceeds with the diagnostic work-up. In case the nodule size does not reach the threshold the person continues with the annual periodicity follow-up till the requirements for the positive result are met ( $D \geq 7$  mm). The cancer-indicating values for nodule size ( $V_{cut}, D_{cut}$ ) and tumour growth ( $VDT_{cut}, Growth_{cut}$ ) were taken from the trials and varied in the screening scenarios.

#### 1.1.5.4. Diagnostic work-up

The diagnostic work-up component models a one-month long period when a patient undergoes a CT-supported biopsy to determine malignancy of the nodule and a head MRI (magnetic resonance imaging) and proceed with diagnosis. Screen-detected nodules are staged according to the TNM system based on the tumour diameter/volume and the progression state at time of diagnosis. During the diagnostic work-up a complication (pneumothorax) may occur, which is modelled as an age-dependent probability (see Table 7).

#### 1.1.5.5. Lung cancer survival

Description is given in the main text.

---


$$^1 VDT = \frac{\ln(2)\Delta t}{\ln(V_2) - \ln(V_1)},$$

where  $\Delta t$  is time in days between the initial screening and the follow-up exams,  $V_1$  is the nodule volume at the time of initial screening, and  $V_2$  is the volume at the follow-up

### **1.1.6. Life history module**

For the screening and no screening scenarios, the *Life History* module calculates the final life scenario for each individual, providing the chronological sequence of events and final age of death along with the cause of death. The module also calculates events of false-positive cases, overdiagnosed cases, interval cancers and radiation induced cancer and deletes obsolete cases.

#### *1.1.6.1. False-positive findings*

False-positive findings of different sizes are simulated for people without lung cancer based on the outcomes of the clinical trials. For the NLST-based on nodule management algorithm, the number of follow-up scans and work-up of false-positive findings are estimated using the ratio of true positive to all positive findings obtained from the NLST trial results. For the NELSON nodule management follow-ups and work-ups of false-positive findings are estimated relative to the number of CT scans. The respective rates are calculated based on the results of the NELSON trial. Diagnostic work-up of false-positive finding includes a CT-supported biopsy, which may induce pneumothorax as a complication with the age-dependent probability (see Table 7). The false-positive findings are retroactively included into the model.

##### *1.1.1.1. Overdiagnosed cases*

A case of overdiagnosis is defined as an individual whose lung cancer is expected to be clinically diagnosed after her age of death from other causes but whose cancer is screen-detected before this age (de Koning, Harry J. et al. 2014).

##### *1.1.1.2. Interval lung cancer*

Interval lung cancer is defined as a cancer which is not initially screen-detected but is diagnosed in the time between scheduled screening exams<sup>14</sup>. The module incorporates two sources of interval lung cancer occurrence. The first is false-negative screening results, which can occur due to the nodule size-dependent sensitivity of CT scan. The second is the truly interval lung cancer, which develops and is diagnosed within the time interval between two screenings.

##### *1.1.1.3. Radiation-induced cancer*

Radiation-induced cancer death may occur in a 10–20-year period after the screening program. The risk is calculated as one radiation-induced cancer death per 2500 screened individuals who received 8 mSv in a 3-year period; these estimates are obtained based on the NLST trial<sup>15</sup>.

### **1.1.7. Screening scenarios**

Based on Table 1 in the main paper, name of a scenario contained specified population, nodule management protocol, thresholds for nodule size and nodule growth. The scenarios were additionally numbered from 1 to 76.

The scenarios that simulated NELSON-like and NLST-like nodule management protocols were 50-75-15-9-NELSON-VDT400-V500 and 55-74-30-15-NLST-GR10-D10.

### 1.1.8. Screening module: Parameters overview

**Table S7: Parameters of the screening component**

| Parameter                                                                                                                                                                                         | NLST                                                                                         | NELSON                                      | Reference     |
|---------------------------------------------------------------------------------------------------------------------------------------------------------------------------------------------------|----------------------------------------------------------------------------------------------|---------------------------------------------|---------------|
| Sensitivity of screening CT exam for peripheral lesions.<br>Sensitivities for a central lesion of the same diameter are 25% lower (Probability of detection)                                      | 0.63 for $D \geq 1\text{mm}$<br>0.77 for $D \geq 4\text{mm}$<br>1.00 for $D \geq 8\text{mm}$ |                                             | <sup>16</sup> |
| Specificity of screening CT exam                                                                                                                                                                  | 0.98                                                                                         |                                             |               |
| Threshold nodule size for follow-up                                                                                                                                                               | $4\text{mm} \leq D < 10\text{mm}$                                                            | $50 \text{ mm}^3 \leq V < 500 \text{ mm}^3$ |               |
| Rate of “Stage II” at diagnosis: parameter for a binomial function which randomly defines whether the person at regional stage* is diagnosed with “Stage II”<br>at screening:<br>at no screening: | 0.298701299<br>0.188034188                                                                   |                                             | <sup>13</sup> |
| Complication rate at work up:<br>malignant nodule: $D \leq 2\text{cm}$<br>malignant nodule: $2 < D \leq 4\text{cm}$<br>malignant nodule: $D > 4\text{cm}$<br>benign nodule                        | 0.33<br>0.3<br>0.15<br>0.23                                                                  |                                             | <sup>17</sup> |
| Long-term survival probability for stages I and II in the case the patients would die from lung cancer in the no screening scenario                                                               | 0.4                                                                                          |                                             | <sup>7</sup>  |

\*people at regional stage of cancer progression can be diagnosed either with stage II or stage III of TNM system.

## 1.2. Model calibration

The calibration process was performed in two steps. Firstly, for each lung cancer type mean and standard deviation of the log-Normal distributed threshold volumes of lymph nodes involvement (regional), distant metastases (distant) and clinical diagnosis were simultaneously calibrated to fit the German UICC data on diseases stage at time of diagnosis <sup>11</sup>. The parameters for the log-Normal distribution of the tumour volumes at time of clinical diagnosis differed depending on the disease stage progression: before and after the lymph nodes involvement (regional stage). Table 6 (section 1.1.4.3) presents the applied parameters in the columns “diagnosis before the regional stage” and “diagnosis after the regional stage”. Data limitations allowed for the calibration of a limited number of parameters per cancer type. Therefore, we assumed that the mean and standard deviations of the threshold volumes are equal (see “Tumour growth” section).

Secondly, we simultaneously calibrated the age- and cancer type-dependent malignant conversion rates and age boundaries of the survival functions (derived from the hazard functions, see section 1.1.4.1). The outcomes of the microsimulation model (no screening scenario) were fitted to German age and cancer type specific annual incidental lung cancer cases of the period 2010-2012<sup>11</sup>. The second calibration step was done separately for males and females.

The Nelder-Mead Simplex method implemented in the R package “FME”<sup>18</sup> was used to minimize squared residuals in both calibration steps.

### 1.3. Health economics

The costs per unit were obtained using EBM (Unit assessment scale applied in the German healthcare) or DRG (Diagnosis Related Groups) codes and are summarized in Table 8. The model includes CT-guided needle biopsy-induced pneumothorax as a complication that leads to increased costs of the staging tests.

**Table S8: Cost per unit: screening and no screening**

|                                | Procedure                                                                     | Code EBM* or DRG**      | Costs per unit                                                                    | Reference              |
|--------------------------------|-------------------------------------------------------------------------------|-------------------------|-----------------------------------------------------------------------------------|------------------------|
| <b>Screening</b>               |                                                                               |                         |                                                                                   |                        |
| Screening                      | Low dose CT Screening                                                         | No yet available        | 150€<br><br>Values for the sensitivity analyses:<br>I: 200€ ; II: 500€; III: 100€ | Experts, <sup>19</sup> |
| Diagnostic work-up and Staging | CT-guided needle biopsy                                                       | EBM code 34505          | 103€                                                                              | <sup>20</sup>          |
|                                | Complication                                                                  | DRG E76C                | 2,976.88€                                                                         | <sup>21,17,22</sup>    |
|                                | Histology (pathology)                                                         | EBM code 19310          | 8.41€                                                                             | <sup>20</sup>          |
|                                | Head magnetic resonance imaging (MRI)                                         | EBM code 34410          | 126.59€                                                                           | <sup>20</sup>          |
|                                | Medical contrast medium for MRI                                               | EBM code 34452          | 46.55€                                                                            | <sup>20</sup>          |
| <b>No screening</b>            |                                                                               |                         |                                                                                   |                        |
| Diagnostic work-up and Staging | Positron emission tomography (PET)                                            | EBM code 34701          | 589.95€                                                                           | <sup>20</sup>          |
|                                | Endobronchial ultrasound-guided trans bronchial needle aspiration (EBUS-TBNA) | EBM code 13662 or 09315 | 988.00€                                                                           | <sup>20</sup>          |
|                                | Histology (pathology)                                                         | EBM code 19310          | 8.41€                                                                             | <sup>20</sup>          |
|                                | Head MRI                                                                      | EBM code 34410          | 126.59€                                                                           | <sup>20</sup>          |
|                                | Medical contrast medium for MRT                                               | EBM code 34452          | 46.55€                                                                            | <sup>20</sup>          |

\* Unit assessment scale applied in the German healthcare

\*\* Diagnosis Related Groups

In the calculations of the total cost of screening we did not include lifetime lung cancer treatment costs and the costs for pharmaceuticals. The reason of omitting these expenditures is that there is partly available German data on life time costs stratified across ages and cancer stages and histology. Therefore we made the assumptions based on the literature. We based these assessments on data given by Mc Guire et al. <sup>23</sup> who calculated the costs of non-small cell lung cancer for Germany, France and England.

The average treatment costs for patients with metastatic disease were 27,932€ for the first year and 22,909€ for the second year after the diagnoses. We used these values to calculate costs for people with the advanced cancers in our model output. For that we calculated the mean survival of the patients with stage III and IV which is 1.100702 years (50-75-15-9-NELSON-VDT400-V500). Based on the mean survival and the average costs for each year (Mc. Guire) we calculated treatment costs of 26,698€ for advanced cancers (stage III and IV).

Mc Guire et al. <sup>23</sup> do not provide cost data for people with the early-staged cancers. In order to determine relevant costs for the early-staged cancers we took data on the lifetime costs for people with the early-staged cancers in the UK calculated by the British Department of Health <sup>24</sup>. Based on their estimates we calculated the ratio between the costs given for I-II and III-IV stages: (i) ratio of costs between III and I stages is used to define a base case scenario. Under these assumptions total treatment costs for Stage I and II are 30,101€ and for stage III

and IV 45,808€ (example for 50-75-15-9-NELSON-VDT400-V500). In order to obtain the costs for people with early-stage cancer in our model we applied these ratios to the costs calculated based on the mean survival and the average costs for late cancers <sup>23</sup>. The same calculations were performed for each of the six evaluated scenarios and scenarios of the sensitivity analysis.

## 1.4. Sensitivity analysis

### *Parameter uncertainty:*

We varied the nodule size-dependent sensitivity parameters of LDCT exam within a range of  $\pm 20\%$ . The long term survival probability for the screened individuals – who were diagnosed at screening with lung cancer in stage I or II and who would die of the cancer in the non-screening scenario – was tested for the range of values: 20%, 30%, 50% and 60%. We decreased adherence for the next years after the initial screening to 85%.

### *Additional scenarios:*

We prolonged the period of the screening program and simulated ten years of annual screening for each of the evaluated scenarios. The cost per LDCT unit varied across three different scenarios (Table 8). Additionally, the total costs were analyzed for a hypothetical scenario (scenario 4) when staging tests at screening were the same as at clinical settings in no screening scenario.

Because treatment costs are based on different assumptions we tested possible impacts of the treatment costs in the sensitivity analyses. In the pessimistic scenario the costs for Stage I and II are based on the ratio of costs between stage IV and I (see Table 9, example is given for 50-75-15-9-NELSON-VDT400-V500). In the last years a few cost inducing pharmaceutical drugs for lung cancer treatment have been developed and introduced to the market <sup>25</sup>. It is possible that they were not taken into the calculations by Mc Guire et al. To account for that we added the third scenario with lifetime costs for the patients with the advanced cancer of 77,702€ <sup>26</sup> (see Table 9).

**Table S9: Lifetime treatment costs for patients diagnosed with lung cancer by cancer stages calculated for 50-75-15-9-NELSON-VDT400-V500.**

| Stages    | Lifetime costs (British department of health <sup>23</sup> ) | Max Scenario (Cost Ratio IV / I) | Min Scenario (Cost Ratio III / I) | Scenario with new treatment options |
|-----------|--------------------------------------------------------------|----------------------------------|-----------------------------------|-------------------------------------|
| Stage I   | 7,135.00 £                                                   | 45,803.38 €**                    | 31,960.12 €**                     | 118,234.97 €**                      |
| Stage II  | 7,135.00 £                                                   | 45,803.38 €**                    | 31,960.12 €**                     | 118,234.97 €**                      |
| Stage III | 6,720.00 £                                                   | 30,101.20 €*                     | 30,101.20 €*                      | 77,702.00 €                         |
| Stage IV  | 4,689.00 £                                                   | 30,101.20 €*                     | 30,101.20 €*                      | 77,702.00 €                         |

\*calculated based on the mean survival and the average costs for late cancers <sup>23</sup>

\*\* calculated based on the cost ratios multiplied with the costs for people with the advanced cancers

## 2. Results

### 2.1. Calibration

Figure S1: Diagnosed lung cancer cases, Men, 2010.

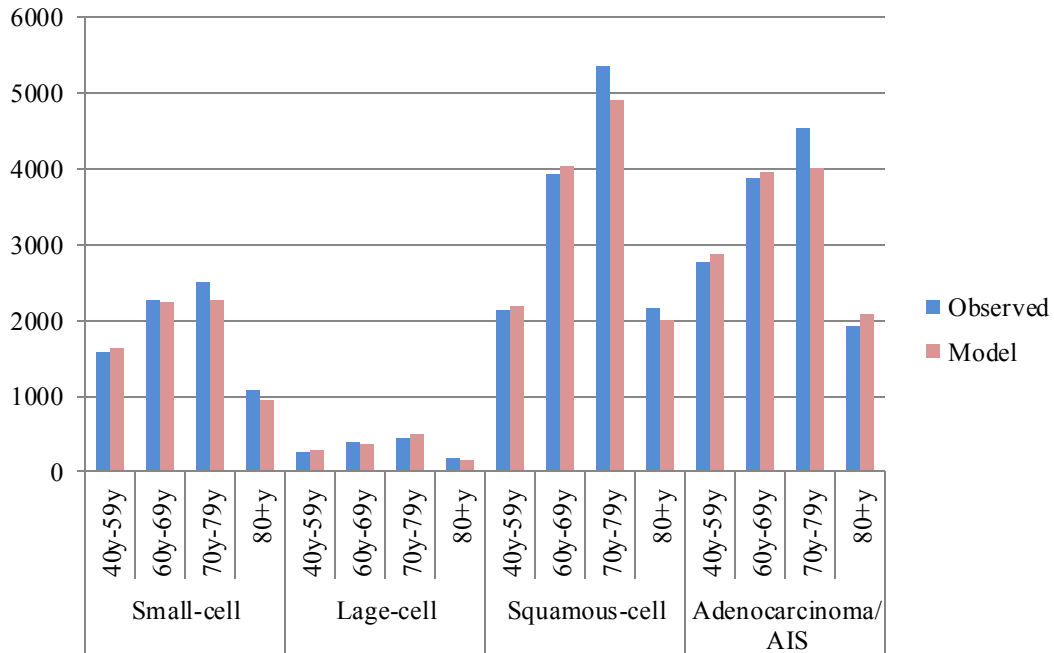

Figure S2: Diagnosed lung cancer cases, Men, 2011.

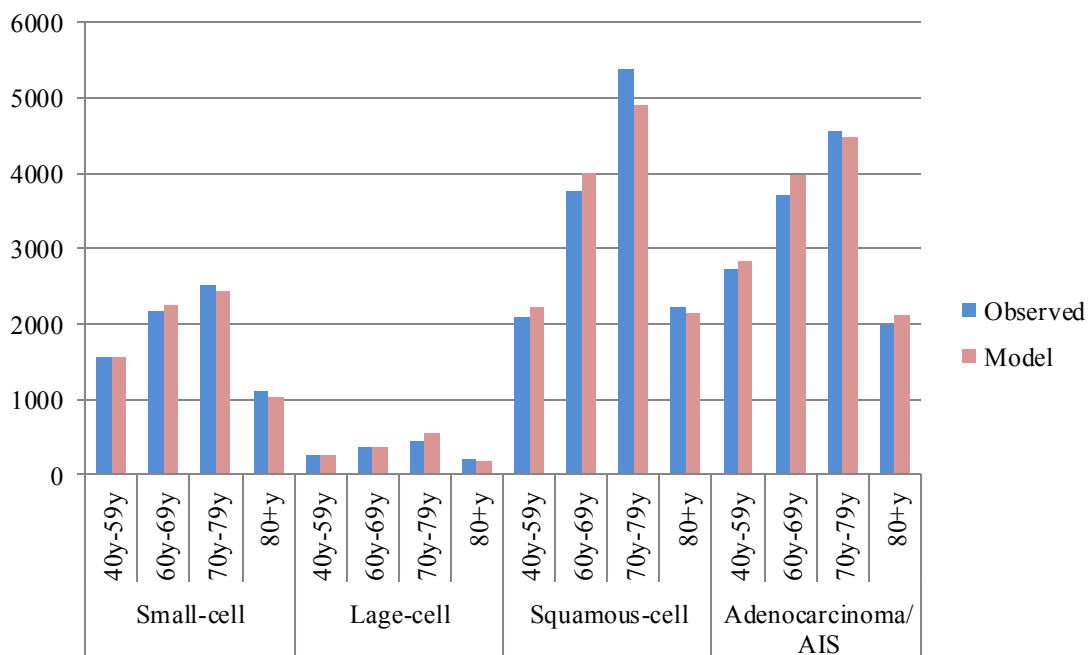

**Figure S3: Diagnosed lung cancer cases, Men, 2012.**

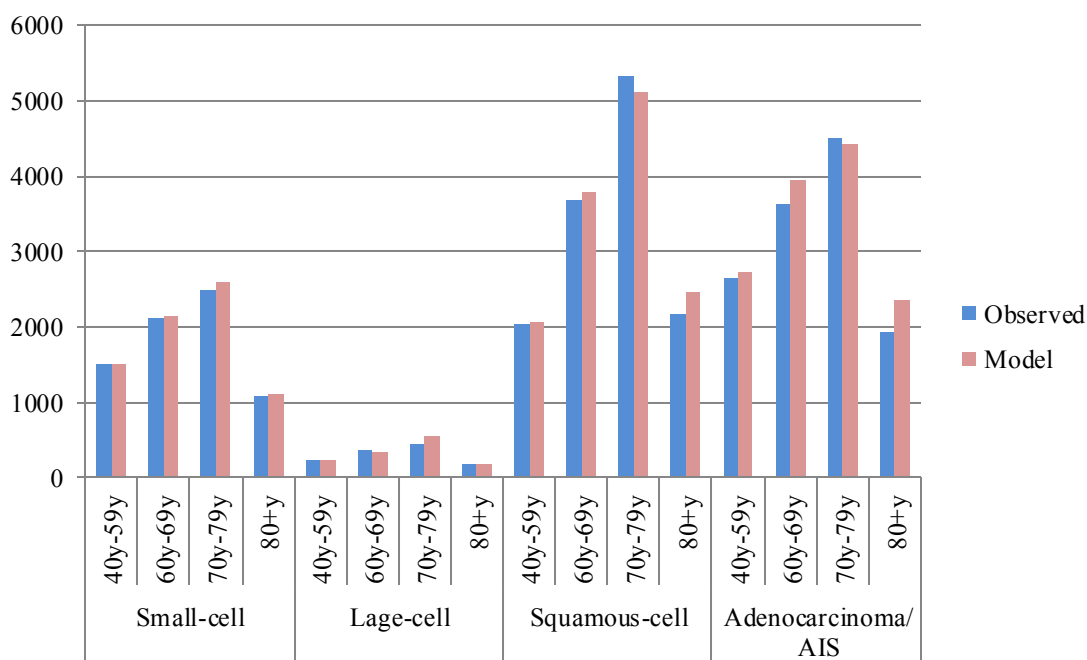

**Figure S4: Diagnosed lung cancer cases, Women, 2010.**

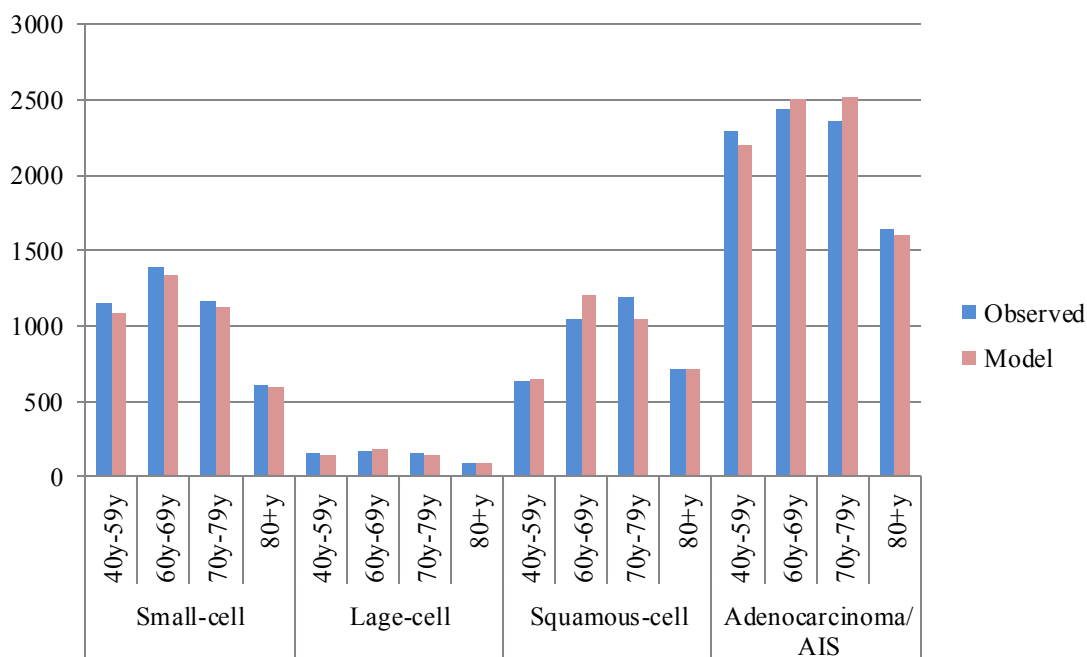



**Figure S5: Diagnosed lung cancer cases, Women, 2011.**

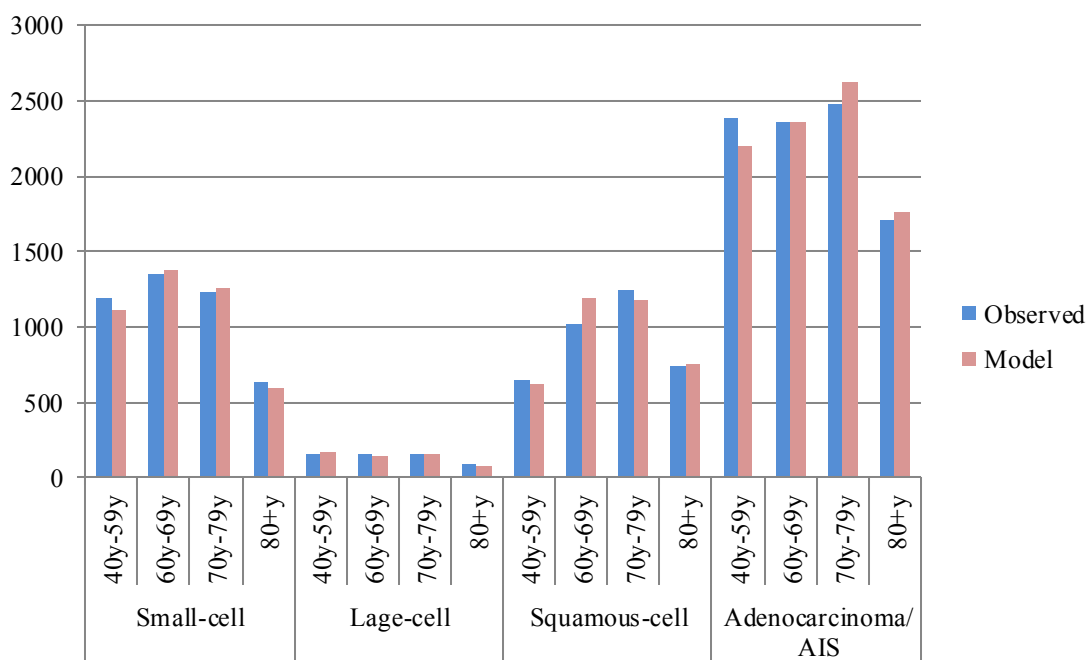

**Figure S6: Diagnosed lung cancer cases, Women, 2012.**

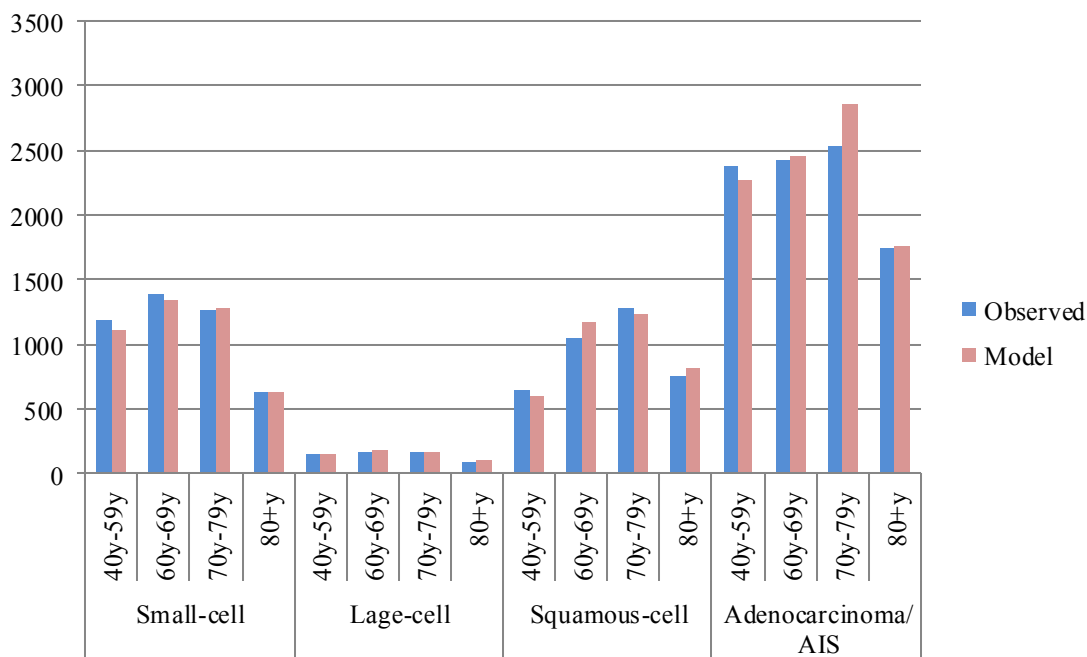

## 2.2. Benefits and harms of lung cancer screening for the baseline scenarios

Table S 10: Benefits and harms of lung cancer screening for the baseline scenarios

|                                                                   | 50-75-15-9-<br>NELSON-<br>VDI400-V500 | 55-74-30-15-<br>NELSON-VDI400-<br>V500 | 50-75-15-9-<br>NLST-GR10-<br>D10 | 55-74-30-15-<br>NLST-GR10-<br>D10 |
|-------------------------------------------------------------------|---------------------------------------|----------------------------------------|----------------------------------|-----------------------------------|
| Number of people screened                                         | 7,431,345                             | 4,373,484                              | 7,431,345                        | 4,373,484                         |
| <b>Screening outcomes</b>                                         |                                       |                                        |                                  |                                   |
| <i>Lung Cancer Findings</i>                                       |                                       |                                        |                                  |                                   |
| Screen detection Stage I                                          | 179,504                               | 126,910                                | 181,468                          | 128,484                           |
| Screen detection Stage II                                         | 114,379                               | 79,598                                 | 109,608                          | 76,595                            |
| Screen detection Stage III                                        | 13,254                                | 9,583                                  | 14,774                           | 10,633                            |
| Screen detection Stage IV                                         | 31,447                                | 22,698                                 | 34,879                           | 25,024                            |
| Screen detection Stage IV                                         | 20,424                                | 15,031                                 | 22,207                           | 16,232                            |
| Stage III, %                                                      | 17.52                                 | 17.89                                  | 19.22                            | 19.48                             |
| Stage IV, %                                                       | 11.38                                 | 11.84                                  | 12.24                            | 12.63                             |
| Total Cases Detected at an Early Stage                            | 127,633                               | 89,181                                 | 124,382                          | 87,228                            |
| Total Cases Detected at an Early Stage, %                         | 71.10                                 | 70.27                                  | 68.54                            | 67.89                             |
| Small-cell carcinoma                                              | 10,048                                | 6,601                                  | 10,528                           | 6,915                             |
| Large-cell carcinoma                                              | 5,003                                 | 3,490                                  | 5,106                            | 3,560                             |
| Squamous-cell carcinoma                                           | 42,688                                | 29,549                                 | 43,182                           | 29,873                            |
| Adenocarcinoma                                                    | 92,003                                | 64,423                                 | 91,697                           | 64,209                            |
| Adenocarcinoma <i>in situ</i>                                     | 29,762                                | 22,847                                 | 30,955                           | 23,927                            |
| Small-cell carcinoma, %                                           | 5.60                                  | 5.20                                   | 5.80                             | 5.38                              |
| Large-cell carcinoma, %                                           | 2.79                                  | 2.75                                   | 2.81                             | 2.77                              |
| Squamous-cell carcinoma, %                                        | 23.78                                 | 23.28                                  | 23.80                            | 23.25                             |
| Adenocarcinoma, %                                                 | 51.25                                 | 50.76                                  | 50.53                            | 49.97                             |
| Adenocarcinoma <i>in situ</i> , %                                 | 16.58                                 | 18.00                                  | 17.06                            | 18.62                             |
| <i>False-Positive Findings</i>                                    |                                       |                                        |                                  |                                   |
| False-Positive Findings of all screen detected findings           | 262,311                               | 185,356                                | 4,531,519                        | 3,208,432                         |
| False-Positive Findings of all screen detected findings           | 59.37                                 | 59.36                                  | 96.15                            | 96.15                             |
| <i>Interval cancer: False Negative Detection</i>                  |                                       |                                        |                                  |                                   |
| Small-cell carcinoma                                              | 33,111                                | 21,763                                 | 32,101                           | 21,106                            |
| Large-cell carcinoma                                              | 15,894                                | 10,275                                 | 15,464                           | 9,994                             |
| Large-cell carcinoma                                              | 1,576                                 | 1,044                                  | 1,520                            | 1,005                             |
| Squamous-cell carcinoma                                           | 11,449                                | 7,676                                  | 11,097                           | 7,440                             |
| Adenocarcinoma                                                    | 4,174                                 | 2,754                                  | 4,006                            | 2,660                             |
| Adenocarcinoma <i>in situ</i>                                     | 18.00                                 | 14.00                                  | 14.00                            | 7.00                              |
| Interval Cancer Stage I                                           | 5,363                                 | 3,556                                  | 5,147                            | 3,413                             |
| Interval Cancer Stage II                                          | 1,810                                 | 1,211                                  | 1,765                            | 1,182                             |
| Interval Cancer Stage III                                         | 8,745                                 | 5,619                                  | 8,467                            | 5,439                             |
| Interval Cancer Stage IV                                          | 17,193                                | 11,377                                 | 16,722                           | 11,072                            |
| <i>True Interval cancer</i>                                       |                                       |                                        |                                  |                                   |
| Small-cell carcinoma                                              | 10,232                                | 6,638                                  | 10,232                           | 6,638                             |
| Small-cell carcinoma                                              | 8,494                                 | 5,504                                  | 8,494                            | 5,504                             |
| Large-cell carcinoma                                              | 201                                   | 142                                    | 201                              | 142                               |
| Squamous-cell carcinoma                                           | 1,517                                 | 981                                    | 1,517                            | 981                               |
| Adenocarcinoma                                                    | 20.00                                 | 11.00                                  | 20.00                            | 11.00                             |
| Adenocarcinoma <i>in situ</i>                                     | 0.00                                  | 0.00                                   | 0.00                             | 0.00                              |
| Interval Cancer Stage I                                           | 818                                   | 535.00                                 | 818                              | 535                               |
| Interval Cancer Stage II                                          | 389                                   | 263                                    | 389                              | 263                               |
| Interval Cancer Stage III                                         | 2,594                                 | 1,683                                  | 2,594                            | 1,683                             |
| Interval Cancer Stage IV                                          | 6,431                                 | 4,157                                  | 6,431                            | 4,157                             |
| Small-cell carcinoma, % of interval cancers                       | 56.27                                 | 55.56                                  | 56.59                            | 55.86                             |
| Stage IV, % of interval cancers                                   | 54.50                                 | 54.70                                  | 54.69                            | 54.89                             |
| <i>Clinical Detection</i>                                         |                                       |                                        |                                  |                                   |
| Clinical Detection                                                | 771,760                               | 435,763                                | 770,918                          | 435,228                           |
| Clinical Detection: onset of cancer before the end of screening   | 208,902                               | 137,329                                | 208,060                          | 136,794                           |
| All detected cancers: onset of cancer before the end of screening | 388,406                               | 264,239                                | 389,528                          | 265,278                           |
| <i>Overdiagnosis</i>                                              |                                       |                                        |                                  |                                   |
| Overdiagnosis, % of screening detected cases                      | 31,005                                | 23,772                                 | 31,385                           | 24,260                            |
| Overdiagnosis, % of screening detected cases                      | 17.27                                 | 18.73                                  | 17.30                            | 18.88                             |
| Small-cell carcinoma                                              | 51.00                                 | 33.00                                  | 52.00                            | 35.00                             |
| Large-cell carcinoma                                              | 147                                   | 110.00                                 | 144                              | 105                               |
| Squamous-cell carcinoma                                           | 1,683                                 | 1,201                                  | 1,606                            | 1,155                             |
| Adenocarcinoma                                                    | 6,429                                 | 4,795                                  | 5,934                            | 4,461                             |
| Adenocarcinoma <i>in situ</i>                                     | 22,695                                | 17,633                                 | 23,649                           | 18,504                            |
| Adenocarcinoma <i>in situ</i> , %                                 | 73.20                                 | 74.18                                  | 75.35                            | 76.27                             |
| Overdiagnosis Stage I                                             | 19,722                                | 14,434                                 | 19,282                           | 14,369                            |
| Overdiagnosis Stage II                                            | 2,368                                 | 1,919                                  | 2,603                            | 2,090                             |
| Overdiagnosis Stage III                                           | 5,613                                 | 4,573                                  | 6,141                            | 4,916                             |
| Overdiagnosis Stage IV                                            | 3,302                                 | 2,846                                  | 3,359                            | 2,885                             |
| <i>Radiation-induced Lung Cancer Deaths</i>                       |                                       |                                        |                                  |                                   |
| Radiation-induced Lung Cancer Deaths                              | 2,390                                 | 1,329                                  | 2,388                            | 1,328                             |
| <b>No screening scenario</b>                                      |                                       |                                        |                                  |                                   |
| Clinical Detection no screening                                   | 919,585                               | 538,385                                | 919,585                          | 538,385                           |
| Clinical Detection Stage 1                                        | 132,312                               | 77,379                                 | 132,312                          | 77,379                            |
| Clinical Detection Stage 2                                        | 56,328                                | 33,417                                 | 56,328                           | 33,417                            |
| Clinical Detection Stage 3                                        | 235,578                               | 138,090                                | 235,578                          | 138,090                           |
| Clinical Detection Stage 4                                        | 495,367                               | 289,499                                | 495,367                          | 289,499                           |
| Clinical Detection: onset of cancer before the end of screening   | 356,727                               | 239,951                                | 356,727                          | 239,951                           |

**Table S 11: Benefits and harms of lung cancer screening for the baseline scenarios (continued)**

|                                                                                                              | 50-75-15-9-<br>NELSON-<br>VDT400-V500 | 55-74-30-15-<br>NELSON-<br>VDT400-V500 | 50-75-15-9-<br>NLST-GR10-<br>D10 | 55-74-30-15-<br>NLST-GR10-<br>D10 |
|--------------------------------------------------------------------------------------------------------------|---------------------------------------|----------------------------------------|----------------------------------|-----------------------------------|
| <i>Clinical detection during the first five years: Histological class</i>                                    |                                       |                                        |                                  |                                   |
| Small-cell carcinoma                                                                                         | 152,040                               | 102,786                                | 152,040                          | 102,786                           |
| Large-cell carcinoma                                                                                         | 35,472                                | 23,234                                 | 35,472                           | 23,234                            |
| Squamous-cell carcinoma                                                                                      | 6,265                                 | 4,321                                  | 6,265                            | 4,321                             |
| Adenocarcinoma                                                                                               | 48,009                                | 32,720                                 | 48,009                           | 32,720                            |
| Adenocarcinoma <i>in situ</i>                                                                                | 59,673                                | 40,630                                 | 59,673                           | 40,630                            |
| Clinical Detection Stage 1                                                                                   | 2,621                                 | 1,881                                  | 2,621                            | 1,881                             |
| Clinical Detection Stage 2                                                                                   | 22,129                                | 15,039                                 | 22,129                           | 15,039                            |
| Clinical Detection Stage 3                                                                                   | 9,129                                 | 6,247                                  | 9,129                            | 6,247                             |
| Clinical Detection Stage 4                                                                                   | 38,797                                | 26,004                                 | 38,797                           | 26,004                            |
| Clinical Detection Stage 4                                                                                   | 81,985                                | 55,496                                 | 81,985                           | 55,496                            |
| <b>Deaths from lung cancer</b>                                                                               |                                       |                                        |                                  |                                   |
| Death from lung cancer: screening                                                                            | 763,653                               | 442,246                                | 764,847                          | 443,061                           |
| Death from lung cancer: onset of cancer before the end of screening                                          | 275,110                               | 184,150                                | 276,304                          | 184,965                           |
| Death from lung cancer: no screening                                                                         | 800,040                               | 467,246                                | 800,040                          | 467,246                           |
| Death from lung cancer: no screening (onset of cancer before the end of screening)                           | 311,497                               | 209,150                                | 311,497                          | 209,150                           |
| <b>Mortality reduction vs no screening, %</b>                                                                | <b>11.68</b>                          | <b>11.95</b>                           | <b>11.30</b>                     | <b>11.56</b>                      |
| <b>Benefits of screening vs no screening</b>                                                                 |                                       |                                        |                                  |                                   |
| <b>Averted death vs no screening</b>                                                                         | <b>36,387</b>                         | <b>25,000</b>                          | <b>35,193</b>                    | <b>24,185</b>                     |
| Life years gained vs no screening                                                                            | 541,697                               | 356,262                                | 525,811                          | 345,918                           |
| <b>Life years gained vs no screening: 3% discount</b>                                                        | <b>355,348</b>                        | <b>236,371</b>                         | <b>346,100</b>                   | <b>230,284</b>                    |
| Life years gained vs no screening: 1.5% discount                                                             | 435,161                               | 288,028                                | 423,115                          | 280,136                           |
| <b>Healthcare resources for the screening program</b>                                                        |                                       |                                        |                                  |                                   |
| Number of Screen exams                                                                                       | 29,969,925                            | 16,660,175                             | 29,955,605                       | 16,650,031                        |
| Number of Follow-up scans                                                                                    | 2,781,924                             | 1,525,291                              | 4,011,903                        | 2,839,342                         |
| Number of Follow-up scans: malignant nodules                                                                 | 100,296                               | 71,876                                 | 157,843                          | 110,595                           |
| Number of Work-ups                                                                                           | 441,815                               | 312,266                                | 945,678                          | 669,564                           |
| Number of Work-ups: malignant nodules                                                                        | 171,637                               | 121,317                                | 173,250                          | 122,633                           |
| Number of Complications                                                                                      | 117,474                               | 82,898                                 | 233,375                          | 165,097                           |
| <b>Efficiency of screening</b>                                                                               |                                       |                                        |                                  |                                   |
| Detected cancer per 1000 scans                                                                               | 5.99                                  | 7.62                                   | 6.06                             | 7.72                              |
| Interval cancers per 1000 screen-scans                                                                       | 1.45                                  | 1.70                                   | 1.41                             | 1.67                              |
| Lung cancer deaths per 1000 screen-scans: onset of cancer before the end of screening                        | 9.18                                  | 11.05                                  | 9.22                             | 11.11                             |
| Averted lung cancer deaths vs no screening per 1000 screen-scans                                             | 1.21                                  | 1.50                                   | 1.17                             | 1.45                              |
| Life years gained (3% discount) vs no screening per 1000 screen-scans                                        | 11.86                                 | 14.19                                  | 11.55                            | 13.83                             |
| <b>Health economics outcomes of screening vs no screening</b>                                                |                                       |                                        |                                  |                                   |
| Total costs (discounted)                                                                                     | 29363651302                           | 17776335686                            | 29885787583                      | 18223237851                       |
| Total costs: no screening (discounted)                                                                       | 21900234274                           | 13183590963                            | 21900234274                      | 13183590963                       |
| Additional costs vs. no screening (discounted)                                                               | 7463417028                            | 4592744723                             | 7985553310                       | 5039646887                        |
| ACER: Costs (including life time treatment costs) per Life Year Gained (uniform discounting) vs no screening | 21,003                                | 19,430                                 | 23,072                           | 21,884                            |
| <b>Cost categories (Discounted 3%)</b>                                                                       |                                       |                                        |                                  |                                   |
| Screening scans                                                                                              | 4,243,729,151                         | 2,355,013,913                          | 4,241,738,728                    | 2,353,604,382                     |
| Work-up total malignant                                                                                      | 211,365,526                           | 149,013,209                            | 212,913,711                      | 150,313,048                       |
| Complication                                                                                                 | 178,066,109                           | 125,439,507                            | 179,259,484                      | 126,453,389                       |
| Without complication                                                                                         | 33,299,417                            | 23,573,702                             | 33,654,226                       | 23,859,659                        |
| Follow-up malignant                                                                                          | 15,044,522                            | 10,781,399                             | 23,676,532                       | 16,589,331                        |
| False-Positive Work-up total                                                                                 | 201,146,272                           | 142,104,689                            | 580,683,348                      | 411,030,986                       |
| Complication                                                                                                 | 179,465,545                           | 126,787,810                            | 518,093,885                      | 366,727,652                       |
| Without complication                                                                                         | 21,680,726                            | 15,316,878                             | 62,589,462                       | 44,303,334                        |
| False-Positive Follow-up                                                                                     | 385,177,551                           | 208,247,816                            | 550,582,775                      | 389,724,592                       |
| Interval cancer: False-Negative Detection                                                                    | 55,046,074                            | 36,158,088                             | 53,381,576                       | 35,078,201                        |
| True Interval cancer                                                                                         | 16,964,750                            | 10,988,952                             | 16,964,750                       | 10,988,952                        |
| Treatment                                                                                                    | 24,235,177,456                        | 14,864,027,620                         | 24,205,846,163                   | 14,855,908,359                    |

**Figure S7: Accumulated lung cancer death cases 50-75-15-9-NELSON-VDT400-V500 vs. 50-75-15-9-NLST-GR10-D10**

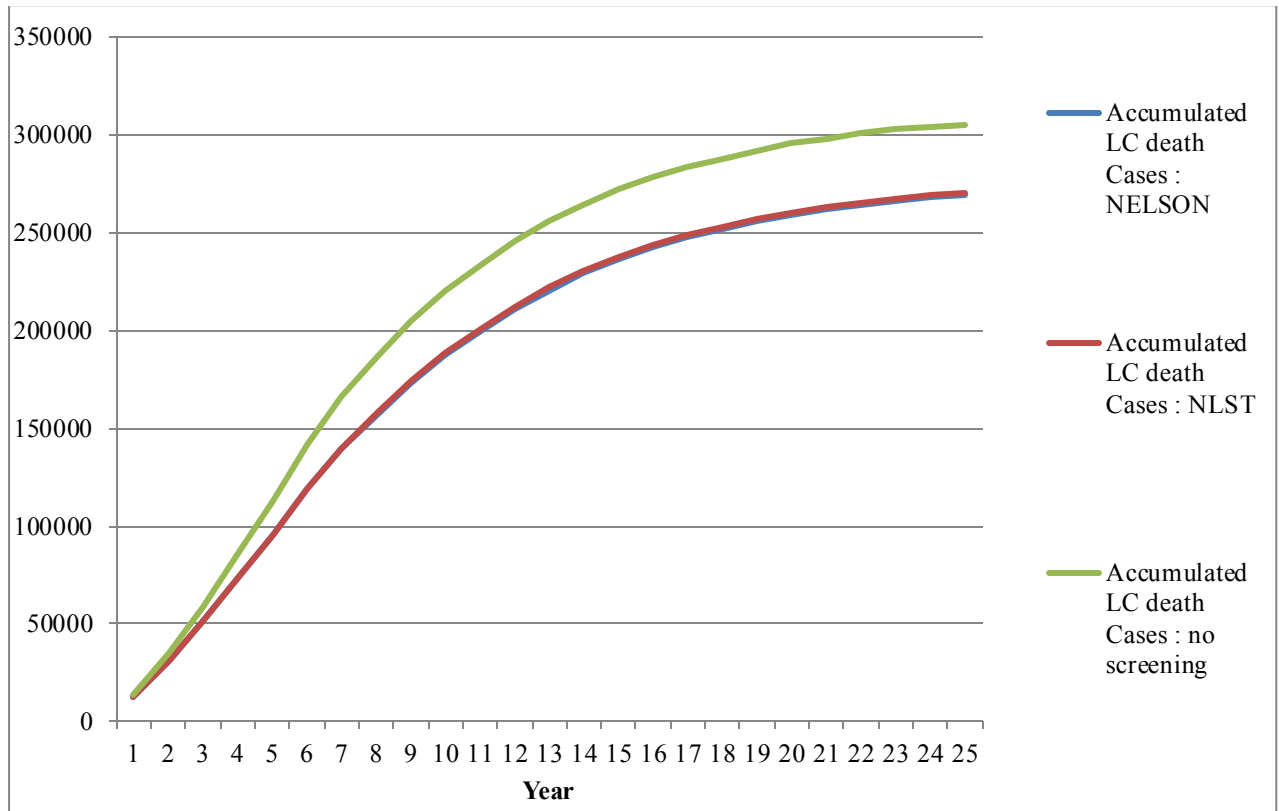

**Figure S8: Accumulated lung cancer death cases 55-74-30-15-NELSON-VDT400-V500 vs. 55-74-30-15-NLST-GR10-D10**

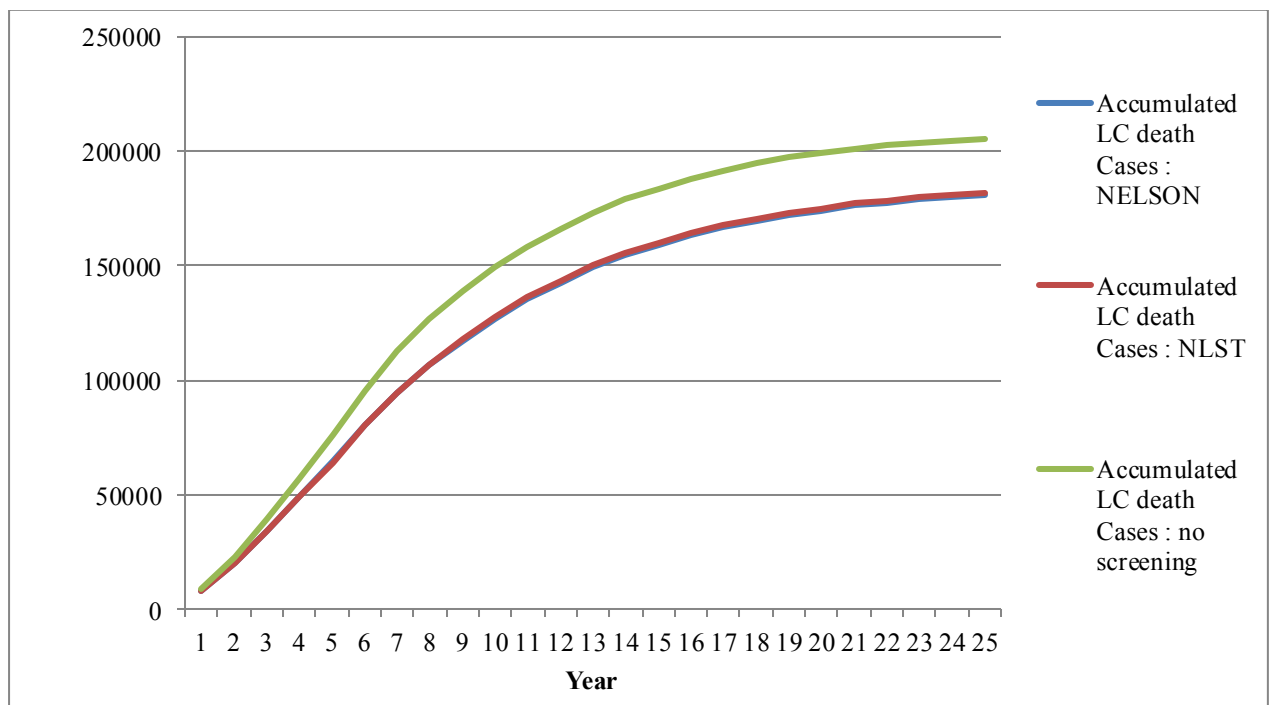

## 2.3. Main outcomes and Cost-effectiveness of the 76 baseline screening scenarios.

Table S12: Main outcomes and Cost-effectiveness of the 76 baseline screening scenarios.

| Scenario    | Scenario characteristics       | Detected cancers at an early stage (I/II), % | Reduction in lung cancer mortality, % | Lung cancer deaths averted | Discounted life years gained | Interval cancer cases | Over diagnosed cases | Over diagnosis, % | Discounted total cost, million Euro | Discounted additional costs vs no screening, million Euro | Cost per life years gained vs no screening (uniform discounting) Euro | Discounted cost per lung cancer death averted vs no screening, Euro | ICER vs the previous efficient scenario, Euro per LYG | ICER vs the previous efficient scenario, Euro per averted lung cancer death |
|-------------|--------------------------------|----------------------------------------------|---------------------------------------|----------------------------|------------------------------|-----------------------|----------------------|-------------------|-------------------------------------|-----------------------------------------------------------|-----------------------------------------------------------------------|---------------------------------------------------------------------|-------------------------------------------------------|-----------------------------------------------------------------------------|
| Scenario 65 | 55-75-40-10-NELSON-VDT300-none | 67.31                                        | 9.95                                  | 14,373                     | 133,222                      | 23,057                | 6,733                | 9.48              | 10,892,118,387                      | 2,231,946,546                                             | 16,754                                                                | 155,287                                                             | 16,754                                                | 155,287                                                                     |
| Scenario 64 | 55-75-40-10-NELSON-VDT400-none | 67.95                                        | 10.65                                 | 15,395                     | 140,490                      | 21,367                | 9,184                | 11.73             | 11,056,787,394                      | 2,396,615,552                                             | 17,059                                                                | 155,675                                                             | not efficient                                         | 161,124                                                                     |
| Scenario 66 | 55-75-40-10-NELSON-VDT600-none | 68.25                                        | 11.00                                 | 15,891                     | 143,763                      | 20,406                | 12,036               | 14.35             | 11,211,978,121                      | 2,551,806,280                                             | 17,750                                                                | 160,582                                                             | not efficient                                         | not efficient                                                               |
| Scenario 75 | 55-75-40-10-NLST-GR12.5-none   | 67.50                                        | 11.37                                 | 16,430                     | 147,652                      | 19,629                | 15,341               | 17.20             | 11,716,673,226                      | 3,056,501,385                                             | 20,701                                                                | 186,032                                                             | not efficient                                         | not efficient                                                               |
| Scenario 73 | 55-75-40-10-NLST-GR10-none     | 67.91                                        | 11.52                                 | 16,638                     | 149,484                      | 19,570                | 16,074               | 17.75             | 11,766,309,036                      | 3,106,137,195                                             | 20,779                                                                | 186,689                                                             | not efficient                                         | not efficient                                                               |
| Scenario 74 | 55-75-40-10-NLST-GR7.5-none    | 68.20                                        | 11.63                                 | 16,798                     | 150,829                      | 19,514                | 16,812               | 18.34             | 11,811,094,697                      | 3,150,922,856                                             | 20,891                                                                | 187,577                                                             | not efficient                                         | not efficient                                                               |
| Scenario 76 | 55-75-40-10-NLST-Dfup5         | 67.08                                        | 11.26                                 | 16,270                     | 151,944                      | 20,278                | 16,476               | 18.90             | 11,712,212,808                      | 3,052,040,967                                             | 20,087                                                                | 187,587                                                             | not efficient                                         | not efficient                                                               |
| Scenario 67 | 55-75-40-10-NELSON-Vfup80      | 68.43                                        | 11.49                                 | 16,604                     | 154,199                      | 20,558                | 16,389               | 18.92             | 11,381,642,165                      | 2,721,470,324                                             | 17,649                                                                | 163,905                                                             | not efficient                                         | not efficient                                                               |
| Scenario 72 | 55-75-40-10-NLST-GR12.5-D10    | 66.61                                        | 11.48                                 | 16,594                     | 154,561                      | 19,424                | 17,268               | 19.07             | 11,789,031,396                      | 3,128,859,555                                             | 20,243                                                                | 188,554                                                             | not efficient                                         | not efficient                                                               |
| Scenario 70 | 55-75-40-10-NLST-GR10-D11      | 66.84                                        | 11.59                                 | 16,741                     | 155,308                      | 19,429                | 17,366               | 19.11             | 11,800,360,566                      | 3,140,188,725                                             | 20,219                                                                | 187,575                                                             | not efficient                                         | not efficient                                                               |
| Scenario 68 | 55-75-40-10-NLST-GR10-D10      | 67.69                                        | 11.75                                 | 16,976                     | 157,701                      | 19,409                | 17,467               | 19.19             | 11,817,384,038                      | 3,157,212,197                                             | 20,020                                                                | 185,981                                                             | not efficient                                         | not efficient                                                               |
| Scenario 59 | 55-75-40-10-NELSON-VDT400-V750 | 68.73                                        | 11.90                                 | 17,201                     | 158,585                      | 19,883                | 16,598               | 18.63             | 11,416,918,590                      | 2,756,746,749                                             | 17,383                                                                | 160,267                                                             | not efficient                                         | not efficient                                                               |
| Scenario 71 | 55-75-40-10-NLST-GR7.5-D10     | 68.35                                        | 11.90                                 | 17,200                     | 159,297                      | 19,404                | 17,647               | 19.30             | 11,838,944,522                      | 3,178,772,681                                             | 19,955                                                                | 184,812                                                             | not efficient                                         | not efficient                                                               |
| Scenario 69 | 55-75-40-10-NLST-GR10-D9       | 68.50                                        | 11.91                                 | 17,212                     | 159,963                      | 19,392                | 17,575               | 19.27             | 11,834,207,265                      | 3,174,035,423                                             | 19,842                                                                | 184,408                                                             | not efficient                                         | not efficient                                                               |
| Scenario 62 | 55-75-40-10-NELSON-VDT300-V500 | 69.95                                        | 12.14                                 | 17,542                     | 161,967                      | 19,866                | 17,162               | 19.09             | 11,459,390,353                      | 2,799,218,512                                             | 17,283                                                                | 159,572                                                             | not efficient                                         | not efficient                                                               |
| Scenario 58 | 55-75-40-10-NELSON-VDT400-V500 | 70.07                                        | 12.16                                 | 17,564                     | 162,073                      | 19,862                | 17,221               | 19.14             | 11,465,748,287                      | 2,805,576,446                                             | 17,311                                                                | 159,734                                                             | not efficient                                         | not efficient                                                               |
| Scenario 63 | 55-75-40-10-NELSON-VDT600-V500 | 70.30                                        | 12.19                                 | 17,608                     | 162,281                      | 19,857                | 17,656               | 19.49             | 11,491,382,892                      | 2,831,211,051                                             | 17,446                                                                | 160,791                                                             | not efficient                                         | not efficient                                                               |
| Scenario 61 | 55-75-40-10-NELSON-VDT400-V400 | 70.71                                        | 12.27                                 | 17,726                     | 163,470                      | 19,857                | 17,573               | 19.42             | 11,491,130,432                      | 2,830,958,591                                             | 17,318                                                                | 159,707                                                             | not efficient                                         | not efficient                                                               |
| Scenario 60 | 55-75-40-10-NELSON-VDT400-V300 | 71.35                                        | 12.38                                 | 17,889                     | 164,864                      | 19,854                | 17,892               | 19.69             | 11,515,704,974                      | 2,855,533,133                                             | 17,321                                                                | 159,625                                                             | 19,707                                                | 184,009                                                                     |
| Scenario 8  | 55-74-30-15-NELSON-VDT300-none | 67.41                                        | 9.72                                  | 20,335                     | 192,747                      | 33,009                | 9,106                | 9.12              | 16,964,229,032                      | 3,780,638,069                                             | 19,615                                                                | 185,918                                                             | not efficient                                         | not efficient                                                               |
| Scenario 7  | 55-74-30-15-NELSON-VDT400-none | 68.13                                        | 10.47                                 | 21,908                     | 204,456                      | 30,527                | 12,562               | 11.37             | 17,202,833,077                      | 4,019,242,114                                             | 19,658                                                                | 183,460                                                             | not efficient                                         | not efficient                                                               |
| Scenario 27 | 55-80-30-15-NELSON-VDT300-none | 67.52                                        | 10.10                                 | 23,029                     | 207,468                      | 38,212                | 11,724               | 10.14             | 17,709,501,637                      | 4,159,369,822                                             | 20,048                                                                | 180,614                                                             | not efficient                                         | not efficient                                                               |
| Scenario 9  | 55-74-30-15-NELSON-VDT600-none | 68.49                                        | 10.82                                 | 22,633                     | 209,464                      | 29,157                | 16,599               | 14.01             | 17,425,676,762                      | 4,242,085,799                                             | 20,252                                                                | 187,429                                                             | not efficient                                         | not efficient                                                               |
| Scenario 18 | 55-74-30-15-NLST-GR12.5-none   | 67.86                                        | 11.21                                 | 23,437                     | 215,599                      | 28,049                | 21,270               | 16.88             | 18,086,156,020                      | 4,902,565,056                                             | 22,739                                                                | 209,181                                                             | not efficient                                         | not efficient                                                               |
| Scenario 16 | 55-74-30-15-NLST-GR10-none     | 68.21                                        | 11.35                                 | 23,747                     | 218,277                      | 27,972                | 22,232               | 17.39             | 18,153,904,252                      | 4,970,313,288                                             | 22,771                                                                | 209,303                                                             | not efficient                                         | not efficient                                                               |
| Scenario 17 | 55-74-30-15-NLST-GR7.5-none    | 68.46                                        | 11.46                                 | 23,962                     | 220,191                      | 27,900                | 23,237               | 17.96             | 18,215,134,331                      | 5,031,543,367                                             | 22,851                                                                | 209,980                                                             | not efficient                                         | not efficient                                                               |
| Scenario 26 | 55-80-30-15-NELSON-VDT400-none | 68.24                                        | 10.93                                 | 24,917                     | 220,616                      | 35,048                | 16,282               | 12.62             | 18,002,132,447                      | 4,452,000,631                                             | 20,180                                                                | 178,673                                                             | not efficient                                         | not efficient                                                               |
| Scenario 19 | 55-74-30-15-NLST-Dfup5         | 67.28                                        | 11.07                                 | 23,152                     | 221,728                      | 28,955                | 22,938               | 18.63             | 18,078,388,416                      | 4,894,797,453                                             | 22,076                                                                | 211,420                                                             | not efficient                                         | not efficient                                                               |
| Scenario 10 | 55-74-30-15-NELSON-Vfup80      | 68.62                                        | 11.29                                 | 23,620                     | 224,880                      | 29,359                | 22,740               | 18.59             | 17,662,309,284                      | 4,478,718,321                                             | 19,916                                                                | 189,616                                                             | not efficient                                         | not efficient                                                               |
| Scenario 15 | 55-74-30-15-NLST-GR12.5-D10    | 66.85                                        | 11.31                                 | 23,646                     | 225,756                      | 27,773                | 24,000               | 18.76             | 18,184,707,034                      | 5,001,116,071                                             | 22,153                                                                | 211,499                                                             | not efficient                                         | not efficient                                                               |
| Scenario 28 | 55-80-30-15-NELSON-VDT600-none | 68.57                                        | 11.35                                 | 25,871                     | 226,617                      | 33,118                | 21,861               | 15.63             | 18,293,791,730                      | 4,743,659,914                                             | 20,932                                                                | 183,358                                                             | not efficient                                         | not efficient                                                               |
| Scenario 13 | 55-74-30-15-NLST-GR10-D11      | 67.05                                        | 11.39                                 | 23,831                     | 226,640                      | 27,773                | 24,145               | 18.81             | 18,200,613,216                      | 5,017,022,253                                             | 22,136                                                                | 210,525                                                             | not efficient                                         | not efficient                                                               |
| Scenario 11 | 55-74-30-15-NLST-GR10-D10      | 67.89                                        | 11.56                                 | 24,185                     | 230,284                      | 27,744                | 24,260               | 18.88             | 18,223,237,851                      | 5,039,646,887                                             | 21,885                                                                | 208,379                                                             | not efficient                                         | not efficient                                                               |

|             |                                |       |       |        |         |        |        |       |                |               |        |         |               |               |
|-------------|--------------------------------|-------|-------|--------|---------|--------|--------|-------|----------------|---------------|--------|---------|---------------|---------------|
| Scenario 2  | 55-74-30-15-NELSON-VDT400-V750 | 68.89 | 11.69 | 24,442 | 231,099 | 28,431 | 22,874 | 18.22 | 17,705,725,213 | 4,522,134,250 | 19,568 | 185,015 | not efficient | not efficient |
| Scenario 14 | 55-74-30-15-NLST-GR7.5-D10     | 68.57 | 11.72 | 24,512 | 232,766 | 27,736 | 24,493 | 18.99 | 18,253,498,654 | 5,069,907,690 | 21,781 | 206,834 | not efficient | not efficient |
| Scenario 37 | 55-80-30-15-NLST-GR12.5-none   | 67.77 | 11.72 | 26,719 | 232,797 | 31,764 | 28,055 | 18.78 | 19,112,331,877 | 5,562,200,062 | 23,893 | 208,174 | not efficient | not efficient |
| Scenario 12 | 55-74-30-15-NLST-GR10-D9       | 68.72 | 11.73 | 24,527 | 233,603 | 27,721 | 24,418 | 18.97 | 18,247,633,560 | 5,064,042,597 | 21,678 | 206,468 | not efficient | not efficient |
| Scenario 35 | 55-80-30-15-NLST-GR10-none     | 68.13 | 11.89 | 27,092 | 235,833 | 31,657 | 29,431 | 19.39 | 19,199,988,990 | 5,649,857,174 | 23,957 | 208,543 | not efficient | not efficient |
| Scenario 5  | 55-74-30-15-NELSON-VDT300-V500 | 70.15 | 11.94 | 24,973 | 236,226 | 28,407 | 23,689 | 18.68 | 17,767,037,281 | 4,583,446,318 | 19,403 | 183,536 | not efficient | not efficient |
| Scenario 1  | 55-74-30-15-NELSON-VDT400-V500 | 70.27 | 11.95 | 25,000 | 236,371 | 28,401 | 23,772 | 18.73 | 17,776,335,686 | 4,592,744,723 | 19,430 | 183,710 | not efficient | not efficient |
| Scenario 6  | 55-74-30-15-NELSON-VDT600-V500 | 70.52 | 11.98 | 25,059 | 236,665 | 28,392 | 24,434 | 19.12 | 17,814,338,122 | 4,630,747,159 | 19,567 | 184,794 | not efficient | not efficient |
| Scenario 36 | 55-80-30-15-NLST-GR7.5-none    | 68.34 | 12.00 | 27,350 | 238,024 | 31,556 | 30,922 | 20.08 | 19,284,015,000 | 5,733,883,184 | 24,090 | 209,648 | not efficient | not efficient |
| Scenario 4  | 55-74-30-15-NELSON-VDT400-V400 | 70.90 | 12.06 | 25,223 | 238,424 | 28,393 | 24,278 | 19.03 | 17,812,380,227 | 4,628,789,264 | 19,414 | 183,515 | not efficient | not efficient |
| Scenario 3  | 55-74-30-15-NELSON-VDT400-V300 | 71.58 | 12.18 | 25,467 | 240,626 | 28,389 | 24,767 | 19.32 | 17,849,042,023 | 4,665,451,059 | 19,389 | 183,196 | not efficient | not efficient |
| Scenario 38 | 55-80-30-15-NLST -Dfup5        | 66.76 | 11.67 | 26,589 | 240,683 | 32,739 | 31,090 | 21.03 | 19,160,111,768 | 5,609,979,952 | 23,309 | 210,989 | not efficient | not efficient |
| Scenario 29 | 55-80-30-15-NELSON-Vfup80      | 68.00 | 11.89 | 27,104 | 244,027 | 33,178 | 30,722 | 20.93 | 18,625,060,345 | 5,074,928,530 | 20,797 | 187,239 | not efficient | not efficient |
| Scenario 34 | 55-80-30-15-NLST-GR12.5-D10    | 66.35 | 11.89 | 27,105 | 244,796 | 31,380 | 32,411 | 21.15 | 19,281,610,562 | 5,731,478,747 | 23,413 | 211,455 | not efficient | not efficient |
| Scenario 32 | 55-80-30-15-NLST-GR10-D11      | 66.56 | 11.98 | 27,308 | 245,671 | 31,391 | 32,590 | 21.19 | 19,299,330,176 | 5,749,198,361 | 23,402 | 210,532 | not efficient | not efficient |
| Scenario 30 | 55-80-30-15-NLST -GR10-D10     | 67.37 | 12.16 | 27,706 | 249,634 | 31,348 | 32,764 | 21.27 | 19,325,894,027 | 5,775,762,212 | 23,137 | 208,466 | not efficient | not efficient |
| Scenario 21 | 55-80-30-15-NELSON-VDT400-V750 | 68.19 | 12.28 | 27,987 | 250,445 | 32,125 | 30,739 | 20.47 | 18,661,518,852 | 5,111,387,037 | 20,409 | 182,634 | not efficient | not efficient |
| Scenario 33 | 55-80-30-15-NLST-GR7.5-D10     | 68.04 | 12.31 | 28,062 | 252,243 | 31,338 | 33,098 | 21.40 | 19,361,758,630 | 5,811,626,814 | 23,040 | 207,100 | not efficient | not efficient |
| Scenario 31 | 55-80-30-15-NLST-GR10-D9       | 68.18 | 12.32 | 28,080 | 253,130 | 31,313 | 32,991 | 21.38 | 19,354,607,603 | 5,804,475,788 | 22,931 | 206,712 | not efficient | not efficient |
| Scenario 24 | 55-80-30-15-NELSON-VDT300-V500 | 69.49 | 12.55 | 28,596 | 256,006 | 32,094 | 31,929 | 21.02 | 18,741,364,602 | 5,191,232,786 | 20,278 | 181,537 | not efficient | not efficient |
| Scenario 20 | 55-80-30-15-NELSON-VDT400-V500 | 69.61 | 12.56 | 28,625 | 256,159 | 32,086 | 32,050 | 21.08 | 18,752,973,157 | 5,202,841,342 | 20,311 | 181,759 | not efficient | not efficient |
| Scenario 25 | 55-80-30-15-NELSON-VDT600-V500 | 69.89 | 12.59 | 28,694 | 256,478 | 32,077 | 32,983 | 21.53 | 18,803,698,202 | 5,253,566,386 | 20,483 | 183,089 | not efficient | not efficient |
| Scenario 23 | 55-80-30-15-NELSON-VDT400-V400 | 70.25 | 12.67 | 28,877 | 258,339 | 32,076 | 32,752 | 21.42 | 18,798,713,288 | 5,248,581,472 | 20,317 | 181,756 | not efficient | not efficient |
| Scenario 22 | 55-80-30-15-NELSON-VDT400-V300 | 70.95 | 12.80 | 29,165 | 260,807 | 32,071 | 33,473 | 21.76 | 18,846,402,156 | 5,296,270,341 | 20,307 | 181,597 | not efficient | 216,454       |
| Scenario 46 | 50-75-15-9-NELSON-VDT300-none  | 67.40 | 9.68  | 30,147 | 295,093 | 48,838 | 13,432 | 9.09  | 28,347,809,378 | 6,447,575,105 | 21,849 | 213,871 | not efficient | not efficient |
| Scenario 45 | 50-75-15-9-NELSON-VDT400-none  | 68.06 | 10.27 | 31,994 | 308,862 | 45,891 | 17,943 | 11.18 | 28,650,791,510 | 6,750,557,237 | 21,856 | 210,994 | not efficient | not efficient |
| Scenario 47 | 50-75-15-9-NELSON-VDT600-none  | 68.37 | 10.54 | 32,825 | 314,731 | 44,293 | 22,752 | 13.41 | 28,917,092,962 | 7,016,858,689 | 22,295 | 213,766 | not efficient | not efficient |
| Scenario 56 | 50-75-15-9-NLST-GR12.5-none    | 68.06 | 10.95 | 34,122 | 325,575 | 42,717 | 28,483 | 15.84 | 29,748,996,225 | 7,848,761,952 | 24,107 | 230,021 | not efficient | not efficient |
| Scenario 54 | 50-75-15-9-NLST-GR10-none      | 68.40 | 11.08 | 34,525 | 329,167 | 42,610 | 29,643 | 16.29 | 29,830,458,906 | 7,930,224,633 | 24,092 | 229,695 | not efficient | not efficient |
| Scenario 55 | 50-75-15-9-NLST-GR7.5-none     | 68.64 | 11.16 | 34,757 | 331,214 | 42,520 | 30,791 | 16.76 | 29,902,320,995 | 8,002,086,722 | 24,160 | 230,229 | not efficient | not efficient |
| Scenario 57 | 50-75-15-9-NLST -Dfup5         | 68.05 | 10.83 | 33,738 | 333,574 | 44,213 | 29,610 | 17.04 | 29,682,843,414 | 7,782,609,141 | 23,331 | 230,678 | not efficient | not efficient |
| Scenario 48 | 50-75-15-9-NELSON-Vfup80       | 69.39 | 11.02 | 34,317 | 337,355 | 44,808 | 29,451 | 17.05 | 29,191,246,090 | 7,291,011,817 | 21,612 | 212,461 | not efficient | not efficient |
| Scenario 53 | 50-75-15-9-NLST-GR12.5-D10     | 67.49 | 11.05 | 34,418 | 339,475 | 42,368 | 30,993 | 17.17 | 29,828,497,218 | 7,928,262,945 | 23,355 | 230,352 | not efficient | not efficient |
| Scenario 51 | 50-75-15-9-NLST-GR10-D11       | 67.69 | 11.13 | 34,673 | 340,726 | 42,383 | 31,253 | 17.24 | 29,854,521,936 | 7,954,287,663 | 23,345 | 229,409 | not efficient | not efficient |
| Scenario 49 | 50-75-15-9-NLST -GR10-D10      | 68.54 | 11.30 | 35,193 | 346,100 | 42,333 | 31,385 | 17.30 | 29,885,787,583 | 7,985,553,310 | 23,073 | 226,907 | not efficient | not efficient |
| Scenario 40 | 50-75-15-9-NELSON-VDT400-V750  | 69.77 | 11.43 | 35,603 | 347,754 | 43,379 | 29,951 | 16.83 | 29,273,891,072 | 7,373,656,799 | 21,204 | 207,108 | not efficient | not efficient |
| Scenario 52 | 50-75-15-9-NLST-GR7.5-D10      | 69.17 | 11.44 | 35,622 | 349,465 | 42,322 | 31,706 | 17.41 | 29,926,417,893 | 8,026,183,620 | 22,967 | 225,315 | not efficient | not efficient |
| Scenario 50 | 50-75-15-9-NLST-GR10-D9        | 69.37 | 11.45 | 35,669 | 350,891 | 42,301 | 31,560 | 17.37 | 29,918,079,355 | 8,017,845,082 | 22,850 | 224,785 | not efficient | not efficient |
| Scenario 43 | 50-75-15-9-NELSON-VDT300-V500  | 71.00 | 11.67 | 36,352 | 355,128 | 43,349 | 30,891 | 17.22 | 29,351,505,809 | 7,451,271,536 | 20,982 | 204,976 | not efficient | not efficient |
| Scenario 39 | 50-75-15-9-NELSON-VDT400-V500  | 71.10 | 11.68 | 36,387 | 355,348 | 43,343 | 31,005 | 17.27 | 29,363,651,302 | 7,463,417,029 | 21,003 | 205,112 | not efficient | not efficient |
| Scenario 44 | 50-75-15-9-NELSON-VDT600-V500  | 71.30 | 11.71 | 36,465 | 355,742 | 43,335 | 31,770 | 17.60 | 29,408,338,707 | 7,508,104,434 | 21,105 | 205,899 | not efficient | not efficient |
| Scenario 42 | 50-75-15-9-NELSON-VDT400-V400  | 71.72 | 11.78 | 36,709 | 358,394 | 43,334 | 31,596 | 17.52 | 29,409,436,683 | 7,509,202,410 | 20,952 | 204,560 | not efficient | not efficient |
| Scenario 41 | 50-75-15-9-NELSON-VDT400-V300  | 72.39 | 11.90 | 37,075 | 362,039 | 43,331 | 32,183 | 17.78 | 29,455,834,679 | 7,555,600,405 | 20,870 | 203,792 | 23,837        | 285,630       |

The scenarios are sorted arranging life years gained in ascending order.

## 2.4. Cost-effectiveness of the efficient screening scenarios in the sensitivity analyses

Table S13: Cost-effectiveness of the efficient screening scenarios in the sensitivity analyses.

| Sensitivity analysis assumption | Scenario characteristics       | Detected cancers at an early stage (I/II), % | Reduction in lung cancer mortality, % | Lung cancer deaths averted | Discounted life years gained | Interval cancer cases | Over diagnosed cases | Over diagnosis, % | Discounted total cost, million Euro | Discounted additional costs vs no screening, million Euro | Cost per life years gained vs no screening (uniform discounting) Euro | Discounted cost per lung cancer death averted vs no screening, Euro |
|---------------------------------|--------------------------------|----------------------------------------------|---------------------------------------|----------------------------|------------------------------|-----------------------|----------------------|-------------------|-------------------------------------|-----------------------------------------------------------|-----------------------------------------------------------------------|---------------------------------------------------------------------|
| Decreased adherence (85%)       | 55-75-40-10-NELSON-VDT300-only | 67.88                                        | 11.04                                 | 15,951                     | 147,905                      | 18,266                | 14,241               | 17.51             | 11,128,381,492                      | 2,468,209,650                                             | 16,687.80                                                             | 154,736.99                                                          |
|                                 | 55-75-40-10-NELSON-VDT400-V300 | 70.48                                        | 11.71                                 | 16,926                     | 154,633                      | 17,939                | 17,447               | 19.99             | 11,327,266,138                      | 2,667,094,296                                             | 17,247.89                                                             | 157,573.81                                                          |
|                                 | 50-75-15-9-NELSON-VDT400-V300  | 71.59                                        | 11.20                                 | 34,885                     | 339,158                      | 39,059                | 31,360               | 18.12             | 28,876,917,490                      | 6,976,683,217                                             | 20,570.59                                                             | 199,990.92                                                          |
| Decreased CT sensitivity        | 55-75-40-10-NELSON-VDT300-only | 65.91                                        | 8.51                                  | 12,290                     | 113,926                      | 28,728                | 5,822                | 9.40              | 10,769,522,882                      | 2,109,351,040                                             | 18,515.04                                                             | 171,631.49                                                          |
|                                 | 55-75-40-10-NELSON-VDT400-V300 | 69.81                                        | 10.75                                 | 15,538                     | 142,709                      | 25,783                | 16,697               | 20.53             | 11,362,508,546                      | 2,702,336,704                                             | 18,935.96                                                             | 173,917.92                                                          |
|                                 | 50-75-15-9-NELSON-VDT400-V300  | 70.76                                        | 10.31                                 | 32,114                     | 312,327                      | 55,624                | 30,160               | 18.61             | 29,154,812,658                      | 7,254,578,384                                             | 23,227.53                                                             | 225,900.80                                                          |
| Increased CT sensitivity        | 55-75-40-10-NELSON-VDT300-only | 68.97                                        | 10.42                                 | 15,061                     | 139,346                      | 22,429                | 7,189                | 9.82              | 10,946,629,549                      | 2,286,457,708                                             | 16,408.45                                                             | 151,813.14                                                          |
|                                 | 55-75-40-10-NELSON-VDT400-V300 | 72.33                                        | 12.81                                 | 18,507                     | 170,216                      | 19,258                | 18,347               | 19.72             | 11,566,774,883                      | 2,906,603,041                                             | 17,075.97                                                             | 157,054.25                                                          |
|                                 | 50-75-15-9-NELSON-VDT400-V300  | 73.41                                        | 12.34                                 | 38,450                     | 375,036                      | 41,991                | 33,020               | 17.80             | 29,561,115,978                      | 7,660,881,704                                             | 20,427.06                                                             | 199,242.70                                                          |
| Survival 20%                    | 55-75-40-10-NELSON-VDT300-only | 67.31                                        | 4.90                                  | 7,073                      | 64,976                       | 23,057                | 6,733                | 9.48              | 10,892,118,388                      | 2,231,946,546                                             | 34,350.47                                                             | 315,558.68                                                          |
|                                 | 55-75-40-10-NELSON-VDT400-V300 | 71.35                                        | 6.15                                  | 8,886                      | 81,476                       | 19,854                | 17,892               | 19.69             | 11,515,704,975                      | 2,855,533,133                                             | 35,047.54                                                             | 321,351.92                                                          |
|                                 | 50-75-15-9-NELSON-VDT400-V300  | 72.39                                        | 5.90                                  | 18,383                     | 179,031                      | 43,331                | 32,183               | 17.78             | 29,455,834,680                      | 7,555,600,406                                             | 42,202.87                                                             | 411,010.19                                                          |
| Survival 30%                    | 55-75-40-10-NELSON-VDT300-only | 67.31                                        | 7.39                                  | 10,671                     | 98,141                       | 23,057                | 6,733                | 9.48              | 10,892,118,388                      | 2,231,946,546                                             | 22,742.13                                                             | 209,160.02                                                          |
|                                 | 55-75-40-10-NELSON-VDT400-V300 | 71.35                                        | 9.25                                  | 13,372                     | 122,191                      | 19,854                | 17,892               | 19.69             | 11,515,704,975                      | 2,855,533,133                                             | 23,369.47                                                             | 213,545.70                                                          |
|                                 | 50-75-15-9-NELSON-VDT400-V300  | 72.39                                        | 8.85                                  | 27,577                     | 268,594                      | 43,331                | 32,183               | 17.78             | 29,455,834,680                      | 7,555,600,406                                             | 28,130.18                                                             | 273,981.96                                                          |
| Survival 50%                    | 55-75-40-10-NELSON-VDT300-only | 67.31                                        | 12.31                                 | 17,788                     | 163,572                      | 23,057                | 6,733                | 9.48              | 10,892,118,388                      | 2,231,946,546                                             | 13,645.04                                                             | 125,474.85                                                          |
|                                 | 55-75-40-10-NELSON-VDT400-V300 | 71.35                                        | 15.38                                 | 22,218                     | 203,495                      | 19,854                | 17,892               | 19.69             | 11,515,704,975                      | 2,855,533,133                                             | 14,032.47                                                             | 128,523.41                                                          |
|                                 | 50-75-15-9-NELSON-VDT400-V300  | 72.39                                        | 14.76                                 | 45,972                     | 448,474                      | 43,331                | 32,183               | 17.78             | 29,455,834,680                      | 7,555,600,406                                             | 16,847.36                                                             | 164,352.22                                                          |
| Survival 60%                    | 55-75-40-10-NELSON-VDT300-only | 67.31                                        | 17.34                                 | 21,349                     | 196,872                      | 23,057                | 6,733                | 9.48              | 10,892,118,388                      | 2,231,946,546                                             | 11,337.03                                                             | 104,545.72                                                          |
|                                 | 55-75-40-10-NELSON-VDT400-V300 | 71.35                                        | 22.64                                 | 26,676                     | 245,212                      | 19,854                | 17,892               | 19.69             | 11,515,704,975                      | 2,855,533,133                                             | 11,645.18                                                             | 107,045.03                                                          |
|                                 | 50-75-15-9-NELSON-VDT400-V300  | 72.39                                        | 21.69                                 | 55,518                     | 541,052                      | 43,331                | 32,183               | 17.78             | 29,455,834,680                      | 7,555,600,406                                             | 13,964.66                                                             | 136,092.81                                                          |
| Cost per CT200 Euro             | 55-75-40-10-NELSON-VDT300-only | 67.31                                        | 9.95                                  | 14,373                     | 133,222                      | 23,057                | 6,733                | 9.48              | 11,348,079,792                      | 2,687,907,951                                             | 20,176.16                                                             | 187,010.92                                                          |
|                                 | 55-75-40-10-NELSON-VDT400-V300 | 71.35                                        | 12.38                                 | 17,889                     | 164,864                      | 19,854                | 17,892               | 19.69             | 11,971,666,380                      | 3,311,494,538                                             | 20,086.20                                                             | 185,113.45                                                          |
|                                 | 50-75-15-9-NELSON-VDT400-V300  | 72.39                                        | 11.90                                 | 37,075                     | 362,039                      | 43,331                | 32,183               | 17.78             | 31,003,818,424                      | 9,103,584,150                                             | 25,145.34                                                             | 245,545.09                                                          |
| Cost per CT500 Euro             | 55-75-40-10-NELSON-VDT300-only | 67.31                                        | 9.95                                  | 14,373                     | 133,222                      | 23,057                | 6,733                | 9.48              | 14,083,848,222                      | 5,423,676,380                                             | 40,711.57                                                             | 377,351.73                                                          |
|                                 | 55-75-40-10-NELSON-VDT400-V300 | 71.35                                        | 12.38                                 | 17,889                     | 164,864                      | 19,854                | 17,892               | 19.69             | 14,707,434,810                      | 6,047,262,968                                             | 36,680.28                                                             | 338,043.66                                                          |
|                                 | 50-75-15-9-NELSON-VDT400-V300  | 72.39                                        | 11.90                                 | 37,075                     | 362,039                      | 43,331                | 32,183               | 17.78             | 40,291,720,874                      | 18,391,486,601                                            | 50,799.80                                                             | 496,061.68                                                          |
| Cost per CT100 Euro             | 55-75-40-10-NELSON-VDT300-only | 67.31                                        | 9.95                                  | 14,373                     | 133,222                      | 23,057                | 6,733                | 9.48              | 10,436,156,983                      | 1,775,985,141                                             | 13,331.02                                                             | 123,563.98                                                          |
|                                 | 55-75-40-10-NELSON-VDT400-V300 | 71.35                                        | 12.38                                 | 17,889                     | 164,864                      | 19,854                | 17,892               | 19.69             | 11,059,743,569                      | 2,399,571,727                                             | 14,554.84                                                             | 134,136.72                                                          |
|                                 | 50-75-15-9-NELSON-VDT400-V300  | 72.39                                        | 11.90                                 | 37,075                     | 362,039                      | 43,331                | 32,183               | 17.78             | 27,907,850,938                      | 6,007,616,665                                             | 16,593.86                                                             | 162,039.56                                                          |
| Innovative Treatment Cost       | 55-75-40-10-NELSON-VDT300-only | 67.31                                        | 9.95                                  | 14,373                     | 133,222                      | 23,057                | 6,733                | 9.48              | 25,486,357,786                      | 3,539,339,140                                             | 26,567.23                                                             | 246,249.16                                                          |
|                                 | 55-75-40-10-NELSON-VDT400-V300 | 71.35                                        | 12.38                                 | 17,889                     | 164,864                      | 19,854                | 17,892               | 19.69             | 27,055,830,817                      | 5,108,812,172                                             | 30,988.01                                                             | 285,584.00                                                          |
|                                 | 50-75-15-9-NELSON-VDT400-V300  | 72.39                                        | 11.90                                 | 37,075                     | 362,039                      | 43,331                | 32,183               | 17.78             | 66,668,886,830                      | 11,873,009,409                                            | 32,794.87                                                             | 320,243.00                                                          |

**Table S 14: Comparison of the microsimulation model outcomes with the data from the NLST trial.**

|                                                                      | NLST             | 55-74-30-15-NLST-GR10-D10 |
|----------------------------------------------------------------------|------------------|---------------------------|
| Follow-up after end of annual screening                              | median 6.5 years | 7 years*                  |
| Screen exams per person                                              | 2.8              | 3.8                       |
| <i>Lung Cancer specific mortality rate per 100,000 person-years:</i> |                  |                           |
| LDCT                                                                 | 247              | 332                       |
| Radiography/no screening                                             | 309              | 394                       |
| Difference in mortality rates                                        | 62               | 62                        |
| Lung cancer mortality reduction, %                                   | 20.1             | 15.8                      |
| <i>All-cause mortality rate per 100,000 person-years</i>             |                  |                           |
| LDCT                                                                 | 1,303            | 1,930                     |
| Radiography/no screening                                             | 1,395            | 1,986                     |
| Mortality reduction absolute                                         | 92               | 56                        |
| <i>Screen detected Lung Cancer:</i>                                  |                  |                           |
| Proportion of all detected cancer, %                                 | 61.2             | 67.9                      |
| Stage I, %                                                           | 63.0             | 59.6                      |
| Stage II, %                                                          | 7.2              | 8.3                       |
| Stage III, %                                                         | 17.0             | 19.5                      |
| Stage IV, %                                                          | 12.8             | 12.6                      |
| Small-cell carcinoma, %                                              | 7.6              | 5.4                       |
| Large-cell carcinoma, %                                              | 4.3              | 2.8                       |
| Squamous-cell carcinoma, %                                           | 21.1             | 23.2                      |
| Adenocarcinoma, %                                                    | 39.9             | 50.0                      |
| Adenocarcinoma <i>in situ</i> , %                                    | 14.7             | 18.6                      |
| Non-small-cell carcinoma or other, %                                 | 11.6             | n/a                       |
| Carcinoid, %                                                         | 0.8              | n/a                       |

\* for comparison purposes. The model simulates a follow-up over a lifetime course.



## References

- 1 Scheidt-Nave C, Du Y, Knopf H, et al. Verbreitung von Fettstoffwechselstörungen bei Erwachsenen in Deutschland. *Bundesgesundheitsbl.* 2013; **56**: 661–67. doi:10.1007/s00103-013-1670-0.
- 2 Statistisches Bundesamt. Ergebnisse auf Grundlage des Zensus 2011. Wiesbaden, 2016.
- 3 Woloshin S, Schwartz LM, Welch HG. The risk of death by age, sex, and smoking status in the United States: putting health risks in context. *Journal of the National Cancer Institute* 2008; **100**: 845–53. doi:10.1093/jnci/djn124.
- 4 Moolgavkar SH, Luebeck G. Two-Event Model for Carcinogenesis: Biological, Mathematical, and Statistical Considerations. *Risk Analysis* 1990; **10**: 323–41. doi:10.1111/j.1539-6924.1990.tb01053.x.
- 5 McMahon PM, Kong CY, Johnson BE, et al. Chapter 9: The MGH-HMS Lung Cancer Policy Model: Tobacco Control Versus Screening. *Risk Analysis* 2012; **32**: S117-S124. doi:10.1111/j.1539-6924.2011.01652.x.
- 6 Lung Cancer: Current Diagnosis and Treatment.
- 7 Erasmus University Medical Center. MISCAN-Lung (Erasmus) Microsimulation SCreening Analysis (MISCAN) Lung Model. CISNET\_ModelProfile\_LUNG\_ERASMUS\_001\_01132012\_83607.pdf (accessed Jul 28, 2016).
- 8 Chrysanthopoulou AS. Microsimulation Lung Cancer (MILC) model, Package ‘MILC’. <https://cran.r-project.org/web/packages/MILC/MILC.pdf>.
- 9 Hazelton WD, Clements MS, Moolgavkar SH. Multistage carcinogenesis and lung cancer mortality in three cohorts. *Cancer epidemiology, biomarkers & prevention : a publication of the American Association for Cancer Research, cosponsored by the American Society of Preventive Oncology* 2005; **14**: 1171–81. doi:10.1158/1055-9965.EPI-04-0756.
- 10 Zentrum für Krebsregister. Lungenkrebs (Bronchialkarzinom). [http://www.krebsdaten.de/Krebs/DE/Content/Krebsarten/Lungenkrebs/lungenkrebs\\_node.html](http://www.krebsdaten.de/Krebs/DE/Content/Krebsarten/Lungenkrebs/lungenkrebs_node.html) (accessed May 12, 2016).
- 11 Eberle A, Jansen L, Castro F, et al. Lung cancer survival in Germany: A population-based analysis of 132,612 lung cancer patients. *Lung Cancer* 2015; **90**: 528–33. doi:10.1016/j.lungcan.2015.10.007.
- 12 Horeweg N, Scholten ET, de Jong, Pim A, et al. Detection of lung cancer through low-dose CT screening (NELSON): a prespecified analysis of screening test performance and interval cancers. *The Lancet Oncology* 2014; **15**: 1342–50. doi:10.1016/S1470-2045(14)70387-0.
- 13 Aberle DR, Adams AM, Berg CD, et al. Reduced lung-cancer mortality with low-dose computed tomographic screening. *The New England journal of medicine* 2011; **365**: 395–409. doi:10.1056/NEJMoal102873.
- 14 Kvale PA, Johnson CC, Tammemagi M, et al. Interval lung cancers not detected on screening chest X-rays: How are they different? *Lung cancer (Amsterdam, Netherlands)* 2014; **86**: 41–46. doi:10.1016/j.lungcan.2014.07.013.
- 15 Bach PB, Mirkin JN, Oliver TK, et al. Benefits and harms of CT screening for lung cancer: a systematic review. *JAMA* 2012; **307**: 2418–29. doi:10.1001/jama.2012.5521.
- 16 McMahon PM, Kong CY, Bouzan C, et al. Cost-Effectiveness of Computed Tomography Screening for Lung Cancer in the United States. *Journal of Thoracic Oncology* 2011; **6**: 1841–48. doi:10.1097/JTO.0b013e31822e59b3.
- 17 Yeow K-M, Su I-H, Pan K-T, et al. Risk Factors of Pneumothorax and Bleeding. *Chest* 2004; **126**: 748–54. doi:10.1378/chest.126.3.748.
- 18 Soetaert K, Petzoldt T. Inverse Modelling, Sensitivity and Monte Carlo Analysis in R Using Package FME. *J. Stat. Soft.* 2010; **33**. doi:10.18637/jss.v033.i03.
- 19 Diederich S, Wormanns D, Semik M, et al. Screening for Early Lung Cancer with Low-Dose Spiral CT: Prevalence in 817 Asymptomatic Smokers. *Radiology* 2002; **222**: 773–81. doi:10.1148/radiol.2223010490.
- 20 National Association of Statutory Health Insurance Physicians. Uniform Value Scale. <http://www.kbv.de/html/ebm.php> (accessed Jul 27, 2016).
- 21 German Institute for the Hospital Remuneration System (InEK). G-DRG catalog. <http://www.g-drg.de> (accessed Jul 27, 2016).
- 22 Geraghty PR, Kee ST, McFarlane G, Razavi MK, Sze DY, Dake MD. CT-guided Transthoracic Needle Aspiration Biopsy of Pulmonary Nodules: Needle Size and Pneumothorax Rate. *Radiology* 2003; **229**: 475–81. doi:10.1148/radiol.2291020499.
- 23 McGuire A, Martin M, Lenz C, Sollano JA. Treatment cost of non-small cell lung cancer in three European countries: comparisons across France, Germany, and England using administrative databases. *Journal of medical economics* 2015; **18**: 525–32. doi:10.3111/13696998.2015.1032974.
- 24 Department of Health. The likely impact of earlier diagnosis of cancer on costs and benefits to the NHS. <http://www.dh.gov.uk/publications> (accessed Aug 17, 2016).

- 25 Buckland D. New drug treatments for cancer. What the future holds. *Prescriber* 2016; **27**: 17–21. doi:10.1002/psb.1425.
- 26 Schremser K, Rogowski WH, Adler-Reichel S, Tufman ALH, Huber RM, Stollenwerk B. Cost-Effectiveness of an Individualized First-Line Treatment Strategy Offering Erlotinib Based on EGFR Mutation Testing in Advanced Lung Adenocarcinoma Patients in Germany. *PharmacoEconomics* 2015; **33**: 1215–28. doi:10.1007/s40273-015-0305-8.
